# Supplementary material for: How novice, skilled and advanced clinical researchers include variables in a case report form for clinical research: a qualitative study
Source: PubMed Central journal article supplement — BMJ Open. 2017 Sep 18;7(9):e016760. doi: 10.1136/bmjopen-2017-016760 (PMC5623535; doi:10.1136/bmjopen-2017-016760), 2017-09-18
Supplement: bmjopen-2017-016760.draft_revisions.pdf [file bmjopen-2017-016760.draft_revisions.pdf]

# BMJ Open

BMJ Open is committed to open peer review. As part of this commitment we make the peer review history of every article we publish publicly available.

When an article is published we post the peer reviewers' comments and the authors' responses online. We also post the versions of the paper that were used during peer review. These are the versions that the peer review comments apply to.

The versions of the paper that follow are the versions that were submitted during the peer review process. They are not the versions of record or the final published versions. They should not be cited or distributed as the published version of this manuscript.

BMJ Open is an open access journal and the full, final, typeset and author-corrected version of record of the manuscript is available on our site with no access controls, subscription charges or pay-per-view fees (<http://bmjopen.bmj.com>).

If you have any questions on BMJ Open's open peer review process please email [info.bmjopen@bmj.com](mailto:info.bmjopen@bmj.com)

# BMJ Open

## How Novice, Skilled and Advanced Clinical Researchers Include Variables in a Case Report Form for Clinical Research: A Qualitative Study

|                                 |                                                                                                                                                                                                                                                                                                                                                                                                                                                                                                                                                                                                                                                                                                                                                                                                                                                                                                                             |
|---------------------------------|-----------------------------------------------------------------------------------------------------------------------------------------------------------------------------------------------------------------------------------------------------------------------------------------------------------------------------------------------------------------------------------------------------------------------------------------------------------------------------------------------------------------------------------------------------------------------------------------------------------------------------------------------------------------------------------------------------------------------------------------------------------------------------------------------------------------------------------------------------------------------------------------------------------------------------|
| Journal:                        | <i>BMJ Open</i>                                                                                                                                                                                                                                                                                                                                                                                                                                                                                                                                                                                                                                                                                                                                                                                                                                                                                                             |
| Manuscript ID                   | bmjopen-2017-016760                                                                                                                                                                                                                                                                                                                                                                                                                                                                                                                                                                                                                                                                                                                                                                                                                                                                                                         |
| Article Type:                   | Research                                                                                                                                                                                                                                                                                                                                                                                                                                                                                                                                                                                                                                                                                                                                                                                                                                                                                                                    |
| Date Submitted by the Author:   | 14-Mar-2017                                                                                                                                                                                                                                                                                                                                                                                                                                                                                                                                                                                                                                                                                                                                                                                                                                                                                                                 |
| Complete List of Authors:       | <p>Chu, Hongling; Peking University Third Hospital, Research Center of Clinical Epidemiology</p> <p>Zeng, Lin; Peking University Third Hospital, Research Center of Clinical Epidemiology</p> <p>Fetters, Micheal; University of Michigan Department of Family Medicine</p> <p>Li, Nan; Peking University Third Hospital, Research Center of Clinical Epidemiology</p> <p>Tao, Liyuan; Peking University Third Hospital, Research Center of Clinical Epidemiology</p> <p>Shi, Yanyan; Peking University Third Hospital, Research Center of Clinical Epidemiology</p> <p>Zhang, Hua; Peking University Third Hospital, Research Center of Clinical Epidemiology</p> <p>Wang, Xiaoxiao; Peking University Third Hospital, Research Center of Clinical Epidemiology</p> <p>Li, Fengwei; Beijing Aerospace General Hospital</p> <p>zhao, yiming; Peking University Third Hospital, Research Center of Clinical Epidemiology</p> |
| <b>Primary Subject Heading</b>: | Qualitative research                                                                                                                                                                                                                                                                                                                                                                                                                                                                                                                                                                                                                                                                                                                                                                                                                                                                                                        |
| Secondary Subject Heading:      | Research methods                                                                                                                                                                                                                                                                                                                                                                                                                                                                                                                                                                                                                                                                                                                                                                                                                                                                                                            |
| Keywords:                       | QUALITATIVE RESEARCH, clinical study, data collection, research design                                                                                                                                                                                                                                                                                                                                                                                                                                                                                                                                                                                                                                                                                                                                                                                                                                                      |
|                                 |                                                                                                                                                                                                                                                                                                                                                                                                                                                                                                                                                                                                                                                                                                                                                                                                                                                                                                                             |

SCHOLARONE™  
Manuscripts

1  
2  
3  
4  
5  
6  
7  
8  
9  
10  
11  
12  
13  
14  
15  
16  
17  
18  
19  
20  
21  
22  
23  
24  
25  
26  
27  
28  
29  
30  
31  
32  
33  
34  
35  
36  
37  
38  
39  
40  
41  
42  
43  
44  
45  
46  
47  
48  
49  
50  
51  
52  
53  
54  
55  
56  
57  
58  
59  
60

**How Novice, Skilled and Advanced Clinical Researchers Include  
Variables in a Case Report Form for Clinical Research:  
A Qualitative Study**

**Chu Hongling, Zeng Lin, Michael D Fetters, Li Nan, Tao Liyuan, Shi Yanyan,  
Zhang Hua, Wang Xiaoxiao, Li Fengwei, Zhao Yiming**

**Corresponding author:** Zhao Yiming, Peking University Third Hospital, Research  
Center of Clinical Epidemiology, 49#, Huayuanbei Road, Haidian District Beijing,  
P.R.China 100191. [yimingzhao115@163.com](mailto:yimingzhao115@163.com), +86-010-82266577,  
+86-010-82265732.

**Chu Hongling, Zeng Lin, Li Nan, Tao Liyuan, Shi Yanyan, Zhang Hua, Wang  
Xiaoxiao, Zhao Yiming:** Peking University Third Hospital, Research Center of  
Clinical Epidemiology, Beijing, China.

**Michael D Fetters:** University of Michigan Department of Family Medicine, Ann  
Arbor, MI, US.

**Li Fengwei:** Beijing Aerospace General Hospital, Beijing, China.

**Abstract**

**Objectives:** Despite varying degrees in research training, most academic clinicians  
are expected to conduct clinical research. The objective of this research was to  
understand how clinical researchers of different skill levels include variables in a case  
report form for their clinical research.

**Setting:** The setting for this research was a major academic institution in Beijing,  
China.

**Participants:** The target population was 17 clinical researchers with three levels of  
experience, namely, limited clinical research experience, clinicians with rich clinical

1  
2  
3 research experience and clinical research experts.  
4

5 **Methods:** Using a qualitative approach, we conducted 13 individual interviews (face-  
6 to-face) and one group interview (n=4) with clinical researchers from June to  
7 September 2016. We used maximum variation sampling to identify 17 researchers  
8 with three levels of research experience: 8 clinicians with limited clinical research  
9 experience, 5 clinicians with rich clinical research experience, and 4 experts in  
10 clinical research. The researchers had diverse hospital-based medical specialties and  
11 or specialization in clinical research.  
12  
13  
14  
15  
16  
17

18 **Results:** Our analysis yields a typology of three processes developing a case report  
19 form (CRF) that varies according to research experience level. Novice clinician  
20 researchers often have an incomplete protocol or none at all, and conduct data  
21 collection and publication based on a general framework. Experienced clinician  
22 researchers include variables in the case report form based on previous experience  
23 with attention to including domains or items at risk for omission, and by eliminating  
24 unnecessary variables. Expert researchers consider comprehensively in advance data  
25 collection and implementation needs and plan accordingly.  
26  
27  
28  
29  
30  
31  
32

33 **Conclusion:** These results illustrate increasing levels of sophistication in research  
34 planning that reflect increasing levels of selecting variables in case report form. These  
35 findings suggest that novice and intermediate-level researchers could benefit by  
36 emulating the comprehensive planning procedures such as those utilized by expert  
37 clinical researchers.  
38  
39  
40  
41  
42

43 **Keywords:** qualitative research; clinical study; data collection, research design  
44  
45  
46

## 47 **Article summary**

### 48 **Strengths and limitations of this study**

49 The study particularly informs how clinical researchers select variables in a CRF  
50 in their clinical research. In previous research, this question has been only marginally  
51 explored relative to the structure and surface, although it can play an important role in  
52 improving quality of clinical research. Furthermore, based on reports of clinical  
53 research experts, these findings illustrate an overarching and effective process for  
54  
55  
56  
57  
58  
59  
60

1  
2  
3 determining variables for inclusion in a CRF. In addition, the PICO framework for  
4 thinking about the study represents novel thinking in research design raised by these  
5 experts. Additionally, the complementary ideas of “few to many” and “many to few”  
6 for refining the variables in CRF represents innovative thinking for CRF design.  
7  
8

9  
10 A limitation of our study concerns the potential selection bias of our sample.  
11 Clinician participants are from a premier academic hospital in Beijing, and these  
12 participants might have greater knowledge, cognitive skills, and opportunities for  
13 research than clinicians in many other hospitals. We both acknowledge the potential  
14 for variations on the findings, while also acknowledging the results are genuine and  
15 representative of the participants' experiences. Despite variations that exist in practice,  
16 we believe the lessons learned based on this study are robust ideas.  
17  
18

19  
20 These results illustrate increasing levels of sophistication in research planning  
21 that reflect increasing levels of selecting variables in case report form. These findings  
22 suggest that novice and intermediate-level researchers could benefit by emulating the  
23 comprehensive planning procedures such as those utilized by expert clinical  
24 researchers.  
25  
26

## 27 28 29 30 31 32 33 34 35 INTRODUCTION

36  
37  
38  
39 Conducting clinical research is a multistage process. It can be divided into three  
40 stage: the first stage is top-level design, the second stage is protocol design and  
41 implementation, the third stage is conducting data analysis, interpretation and writing  
42 of the paper<sup>1</sup>. During the first two stages, researchers should consider what variables  
43 are important, and how to collect these data.  
44  
45

46  
47  
48 Case report form (CRF) is an instrument to structure and facilitate collection of  
49 data for clinical research<sup>2</sup>. Most CRFs are customized to collect data specific to a  
50 particular clinical study protocol. Case report form development represents a  
51 significant part of the clinical trial process and can impact study success. A  
52 well-designed CRF is required for database construction, data accuracy, data  
53 query/cleaning, CRF completion and statistical analysis.  
54  
55  
56  
57  
58  
59  
60

1  
2  
3  
4  
5  
6  
7  
8  
9  
10  
11  
12  
13  
14  
15  
16  
17  
18  
19  
20  
21  
22  
23  
24  
25  
26  
27  
28  
29  
30  
31  
32  
33  
34  
35  
36  
37  
38  
39  
40  
41  
42  
43  
44  
45  
46  
47  
48  
49  
50  
51  
52  
53  
54  
55  
56  
57  
58  
59  
60

In our institution, to facilitate greater clinical research efficiency, our lab became interested in how to develop an approach to build a CRF. Our interest extended to both the structure and variables of the CRF. The structure has been the topic of concern among some researchers<sup>3-11</sup>. In a published paper, it was emphasized that the design of CRF needs the cooperation and efforts of each member of the study group<sup>7</sup>. In another published related paper, it was noted that the CRF should keep privacy for participants, include a tracked page or modules, and some other things on forms<sup>10</sup>. However, the question that which variables should be selected in CRF has received less consideration but plays a crucial role in the quality of clinical research.

The goal of this qualitative research study was to explore how clinical researchers select variables in a CRF and was part of a larger mixed-methods project to develop an approach for clinical researchers to build systematic variables for clinical research. These findings could provide an approach for choosing variables in a CRF by clinical researchers. This can serve as a reference to other researchers, and lay a foundation for further inquiry into what variables to include in a CRF.

## METHOD

Qualitative inquiry is an approach particularly useful when little is known about the phenomenon under study<sup>12</sup>. As little is known about how clinicians determine variables to include in a CRF we deemed a qualitative approach as useful.

### Setting:

The setting for this research was a major academic institution in Beijing, China.

### Study Population:

The target population was clinical researchers with three levels of experience, namely, limited clinical research experience, clinicians with rich clinical research experience and clinical research experts.

### Data collection instrument:

We developed a semi-structured interview guide based on group discussion and a preliminary pilot study in 2 clinical researchers. The primary interview question generating data for this study was, "What process do you use to design a case report

1  
2  
3 form for clinical research?” Key probes were, “What are the difficulties and  
4 challenges encountered when you designed case report form for your project?” and  
5 “What is your previous experience joining a clinical research project?” The overall  
6 interview guide was designed for a parent study looking comprehensively at clinical  
7 researchers approach to data collection and thus had other questions in the interview  
8 guide.  
9  
10  
11  
12  
13

### 14 15 16 17 **Recruitment:**

18 Individuals targeted for enrollment were contacted by email by a research  
19 assistant. We used maximum variation sampling to identify with different degrees of  
20 research experience and different medical specialties in the hospital and clinical  
21 research institute.  
22  
23

24 The inclusion criteria were:  
25

- 26  
27
- 28 a. Meet one of the following conditions: 1) Clinicians with limited clinical research  
29 experience who were defined as rarely participating in clinical research, a criterion  
30 operationalized as no experience to one experience designing a CRF for clinical  
31 research; 2) clinicians with rich clinical research experience defined as researchers  
32 with experience participating in several clinical research studies and experience  
33 designing three to nine data collection reforms or case report forms for clinical  
34 research. 3) Clinical research experts defined as researchers with experience in  
35 clinical research for five years or more, and participation directly in 10 or more  
36 clinical research projects.  
37  
38
  - 39 b. Being able to express themselves with well-articulated stories and to deeply  
40 reflect on their stories;  
41  
42
  - 43 c. Being willing to participate in the study.  
44  
45  
46  
47  
48  
49  
50  
51

### 52 **Data collection**

53  
54 Two research assistants conducted interviews from June to September in 2016.  
55 The research assistants (RAs) first conducted one group interview with  
56 clinicians who had limited experience in clinical research. As gathering busy  
57  
58  
59  
60

1  
2  
3  
4  
5  
6  
7  
8  
9  
10  
11  
12  
13  
14  
15  
16  
17  
18  
19  
20  
21  
22  
23  
24  
25  
26  
27  
28  
29  
30  
31  
32  
33  
34  
35  
36  
37  
38  
39  
40  
41  
42  
43  
44  
45  
46  
47  
48  
49  
50  
51  
52  
53  
54  
55  
56  
57  
58  
59  
60

clinicians for a group interview proved difficult, the RAs changed to a face-to-face semi-structured in-depth interviews with nine clinicians and four clinical research experts,. The same questions were posed in the same order to all the participants, whether the interviews were performed individually or in the group interview. One question was added for the four clinical research experts, that is, “what did you encounter for when you directed other clinical researchers’ project”. The interviews lasted between (25-40) minutes and were conducted in a location that was quiet without interruption, either the participant’s office or the interviewee’s conference room. All interviews were audio-recorded and transcribed verbatim into Chinese.

### **Data analysis**

The transcribed data were analyzed in Chinese using thematic analysis with an inductive approach. Two researchers (CH and ZI) independently coded and analyzed the transcripts by: selecting the units of analysis, making sense of the transcribed data, developing codes, categorizing the data and abstracting<sup>13</sup>. The analysis focused on text from the four primary questions noted above but also used related information from other interview guide questions and context-specific language probes. The analysts discussed and reached an agreement on the coding and categorization after reviewing one interview. The two researchers independently coded the remaining transcripts. Differences were minimal. All research team members agreed with the final results. After constructing the models, the team confirmed the findings by checking the results with the interviews transcript.

Below, we present the findings of the study by illustrating the three identified models and illustrative quotes from the interviews. The researchers who conducted the data collection and analysis translated the quotes selected for this article into English. Original quotes are available on request.

### **Ethical considerations**

Each participant was informed about the study procedures and was free to withdraw from the research. All participants provided consent to participate in the



study including audiotaping and transcription of the interviews by providing written informed consent. Potentially identifying information was removed from each transcript and each interviewee was assigned a unique identification number to protect his/her anonymity. The institutional review board (IRB) at Peking University Third Hospital approved the study.

## RESULTS

The 17 clinical researchers had diverse background, those are otolaryngology, pharmacy, endocrinology, orthopedics, anesthesia, radiology, neurologist, cardiology, nephrology, Hematology, thoracic surgery, epidemiology and biostatistics, clinical epidemiology, clinical research data management, clinical research methodology.

(Table1)

**Table 1 Demographics of the participants**

| Participants level                         | Clinicians with limited clinical research experience                                                  | Clinicians with rich clinical research experience        | Clinical research experts                     |
|--------------------------------------------|-------------------------------------------------------------------------------------------------------|----------------------------------------------------------|-----------------------------------------------|
| Number                                     | 8                                                                                                     | 5                                                        | 4                                             |
| Gender                                     |                                                                                                       |                                                          |                                               |
| Male (N)                                   | 2                                                                                                     | 2                                                        | 3                                             |
| Female (N)                                 | 6                                                                                                     | 3                                                        | 1                                             |
| Average age (mean $\pm$ SD)                | 26.63 $\pm$ 3.50                                                                                      | 35.40 $\pm$ 2.07                                         | 43.75 $\pm$ 12.45                             |
| Department                                 | Otolaryngology, Pharmacy, Endocrinology, Orthopedics, Anesthesia, Radiology, Neurologist, Cardiology. | Nephrology, Otolaryngology, Thoracic surgery, Hematology | Epidemiology Or Clinical research methodology |
| Experience in clinical research (projects) | Participating in clinical research work for 1-3 years                                                 | Being involved in 5-12 clinical research projects        | Working in clinical research for 11-20 years  |
| Data collection                            | 4 semi-structured in-depth interviews, and 1 group interview for 4 clinicians                         | Semi-structured in-depth interviews                      | Semi-structured in-depth interviews           |

**A typology of how clinical researchers of different skill levels include variables in**

## CRF for clinical research

Based on our analysis, we developed a typology of how clinical researchers of different skill levels select variables in a CRF for clinical research. These three models are illustrated as Figures 1, 2, and 3. The findings are supported by quoted comments from the research participants. The models are illustrated using a flow chart showing the different process for each of three levels of the participants, e.g., novice clinicians with limited clinical research experience, intermediate-level clinicians with rich clinical research experience, and clinical research experts.

### a. The novice clinical researcher's approach to selecting variables in a CRF for clinical research.

Novice clinicians with limited clinical research experience described a multi-faceted approach to selecting variables for inclusion in their CRFs. When they planned the variables to include in their CRFs, most had no clearly defined comprehensive approach.

**Finding the template from similar research and imitating it.** Most novice clinical researchers mentioned that they would find a similar data collection form for reference and modify it according to the needs of their own study. As one endocrinologist noted, “First, I search on the Internet to find a template from similar research, then I modify the template based on my research”. One otolaryngology clinician opined, “I ask for a data collection template from other experienced researchers in my department. I then imitate the template to make my own data collection template, and modify it in places according my research.” An Orthopedics clinician reflected his opinion that most novice clinical researchers are doing like this, “I will imitate another data collection template, then copy what is applicable to my research, and modify those variables that are not applicable. I think most of us are doing like this, because it is easier for us.”

**Discussing with clinicians with rich clinical research experience.** Some novice clinical researchers reported discussing the CRF with experienced clinical researchers. One participant recounted, “I discussed the CRF with clinicians with rich

experience in clinical research. They deleted useless items directly.”

**Modifying again if any problems are found during use.** Some novice clinical researchers directly used the data collection form without a pilot study, and modified it only when they found problems during use. An anesthesia clinician said, “When the CRF is used to collect data in a clinical research project, some variables are found not to be applicable or absent. In this case, I always think about it and then modify/add the variables.” Another cardiology clinician also remarked, “When I use the CRF to collect data from the first few participants, I find some variables can’t get data at all. So I realize that these variables also can’t get data from other participants, and these variables can contribute little to my research. Then I delete them.”

The following flow chart was refined from the above in-depth interviews with four clinicians and a group interview with another four clinicians.

**Figure 1. Novice clinical researchers' approach to developing a CRF for clinical research**

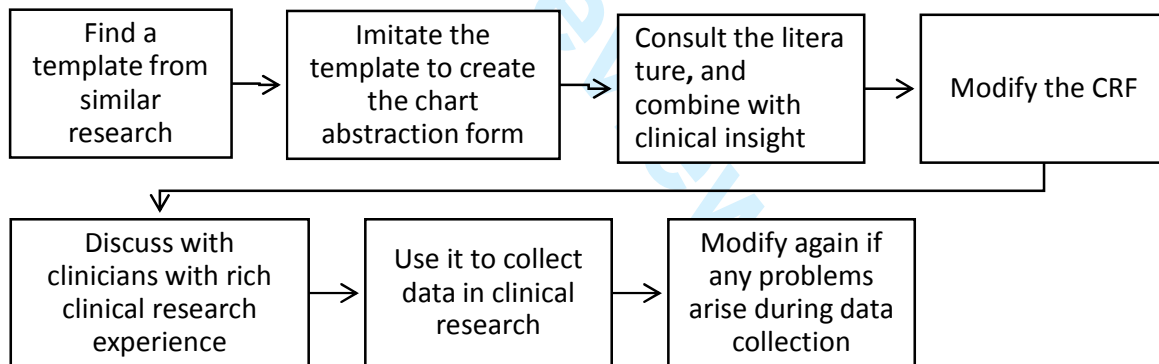

**b. The experienced clinical researcher's approach to selecting variables in a CRF for clinical research.**

Experienced clinical researcher also described a multi-faceted approach about how they include variables in a CRF. Most of them have a clear purpose and protocol firstly, and think about the importance, feasibility and statistics of these variables according to their experience in clinical research.

**Confirming the purpose and protocol.** These clinical researchers first concern themselves with confirming the purpose and developing a protocol before designing

1  
2  
3 the CRF. For example, a nephrologist said, “First, you should confirm the purpose of  
4 your study, disease features or prognosis, follow-up study or cross-sectional study.”  
5  
6

7 **Conducting a literature search for references and related materials.** Most of  
8 the experienced clinical researchers would review the literature and related materials  
9 to consider the variables for inclusion in the CRF. *“I think searching the related  
10 literature and other references is important. You can find many variables mentioned in  
11 other’s research. You also can list all the related items for reference.”*  
12  
13  
14  
15

16 **Finding a template from similar research and intimating it.** Experienced  
17 clinical researchers also find a template to imitate for their own study. However, they  
18 consider the variables according to the research protocol, literature and their previous  
19 experience. One hematologist explained, “(I) search materials first, then find a  
20 template from the literature or similar research previously conducted in my  
21 department. Then I imitate the template to make CRF for my project, and optimize  
22 and perfect the CRF according to the research protocol.”  
23  
24  
25  
26  
27  
28  
29

30 **Consider the importance, feasibility and statistics of fields.** The experienced  
31 clinical researchers note that the importance, feasibility and statistical analysis of  
32 collected variables should be considered before deciding whether to collect the data in  
33 the first place. One hematologist said that, “Even if we do the optimizing and  
34 perfecting, we can also find many problems when we use it to collect data in clinical  
35 research. We can just modify it again and again. In the final version, many variables  
36 are deleted that are not easy to collect, or not very clear, or have little relationship  
37 with primary outcome.”  
38  
39  
40  
41  
42  
43  
44

45 **Conducting pilot study and modify the CRF.** These experienced researchers  
46 also note that piloting the CRF before using to collect data is very important. If any  
47 problems are found in the pilot study, the problem can be resolved in a timely way. A  
48 thoracic surgeon shared, “A pilot study was conducted after the draft CRF was  
49 completed. We then recruited some patients to complete it. We found that some items  
50 or scale could not be completed. For example, the tinnitus handicap inventory is too  
51 complex for patients. And it is not very important for the final evaluation about the  
52 treatment, so we deleted it in the follow-up visits.”  
53  
54  
55  
56  
57  
58  
59  
60

The flow chart depicted in Figure 2 illustrates the overall steps employed by these experienced clinicians based on their interviews.

**Figure 2. Experienced clinical researcher's approach to selecting variables in a CRF for clinical research.**

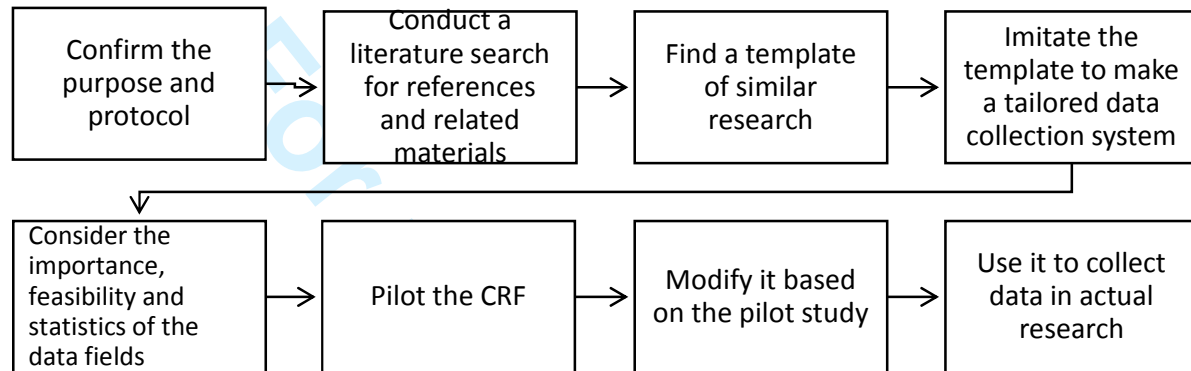

**c. The clinical research experts' approach to selecting variables in a CRF for clinical research.**

Clinical research experts described their multi-faceted approach to identifying variables for inclusion in a CRF or how they help other researchers to design a CRF. They would consider comprehensively about the study, and raised some different and crucial views.

**Confirming the clinical and scientific issues, hypotheses, and research protocol.** A clear research question and hypotheses are essential before you consider which variables should be included in the CRF. One expert working in the research center of epidemiology stated, "First, you complete the top-level design of the clinical research to confirm the clinical issues, scientific issues and hypotheses, and then confirm the research purpose and protocol."

**PICO model is considered to build the causality model.** The PICO Model is a format used to help define the clinical research question. P stands for Patient /Population/problem; I stands for Intervention/Prognostic factor /Exposure; C stands for Comparison; O stands for Outcome sought to measure or achieve<sup>14</sup>. The PICO

1  
2  
3 model as commonly used in evidence-based medicine, can be used to build a causality  
4 model and clearly confirm the related variables in the CRF. Another clinical research  
5 expert working in the epidemiology research center explained, “In clinical research,  
6 you need to confirm the PICO, and build the causality model based on the PICO  
7 model. Then confirm the primary outcome and secondary outcome based on O  
8 (outcome) in PICO model.” “You need to document the domains based on the PICO  
9 model. These domains include but are not limited to population characteristics,  
10 intervention or exposure and related outcome, and related confounding factors  
11 affecting the causality between intervention and outcome.”

12  
13  
14  
15  
16  
17  
18  
19  
20  
21 **What's more, “few to many” and “many to few” are used to list and screen**  
22 **domains and variables in the research.** Many clinical researchers worry about  
23 omitting key variables in the CRF, so they often list as many variables as possible.  
24 However, many variables are not necessary, and added burden of collecting these data,  
25 may even lower the quality of key variables. One expert in clinical research institute  
26 emphasized that, “From less to more', you need to list variables from all domains as  
27 much as possible through multiple way such as clinical practice experience and  
28 literature. ‘Many to few’, we should organize related experts including clinicians,  
29 statisticians, data manager and experts on clinical research design to discuss the  
30 necessity and feasibility of all the domains and variables. It is should be considered in  
31 terms of accuracy, sensitivity and difficulty of detection and collection, statistics,  
32 ethical problems, cost, quality control and so on.” The flow chart depicted in Figure 3  
33 illustrates the overall steps used by these 4 clinical research experts.  
34  
35  
36  
37  
38  
39  
40  
41  
42  
43  
44  
45  
46  
47  
48  
49  
50  
51  
52  
53  
54  
55  
56  
57  
58  
59  
60

**Figure 3. The expert clinical researcher's approach to selecting variables in a CRF for clinical research**

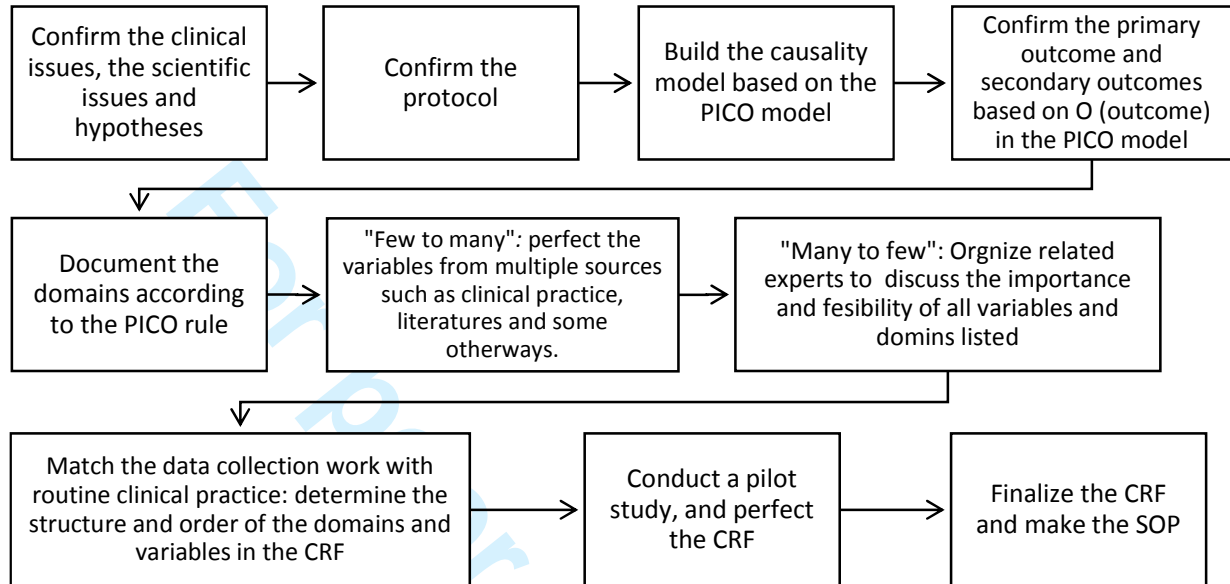

## DISCUSSION

This qualitative study explored the different process of selecting variables in a CRF for clinical research among 3 different levels of clinical researchers. The main findings from this study are that novice, experienced and expert clinical researchers have three progressively sophisticated approaches for selecting variables in a CRF for clinical research. Novice clinician researchers in this study first find a template and then modifying it according to their own study, reviewing it with clinicians with rich clinical research experience, and then completing the CRF to use to collect data. These researchers report operating with a complete protocol, and collect data intending to write an article based on a general structure in mind. If the data were collected according to this process, it would be short of thinking about the whole protocol, study purpose, statistics and so on, which might be a bad quality, in other words, “garbage in garbage out”.

The clinicians with more, but still somewhat limited clinical research experience report trying first to have a more clear purpose and protocol. Similar to novice

1  
2  
3  
4  
5  
6  
7  
8  
9  
10  
11  
12  
13  
14  
15  
16  
17  
18  
19  
20  
21  
22  
23  
24  
25  
26  
27  
28  
29  
30  
31  
32  
33  
34  
35  
36  
37  
38  
39  
40  
41  
42  
43  
44  
45  
46  
47  
48  
49  
50  
51  
52  
53  
54  
55  
56  
57  
58  
59  
60

researchers, they report looking for a related template, and referring to the structure and domains contained in the template. They report incremental steps well such as referring to the literature, considering clinical practice issues and also thinking about the importance, feasibility and statistics analysis of these items. In addition, they draw lessons from previous studies, conducting pilot studies, and testing the feasibility of data collection in clinical practice. They report this process helps them identify potential problems and modify the data collection template. This process is mainly developed from clinicians' clinical research experience. It should be based on not only rich experience, but also high risk of missing some important domains or variables or excessing unnecessary domains or items.

As for the clinical research experts, before building a data collection template, they report a process of considering the design, confirming the clinical and scientific issues and hypotheses, and developing a research protocol. In addition, they report using the PICO model to help build the domains of CRF. What's more, "few to many" and "many to few" are used to list and screen domains and items in the research. This resonates with the advice of Li et al to collect data so as to be able to just answer the scientific issues or hypothesis, nothing more and nothing less<sup>7</sup>.

These results suggest that these clinical researchers have different process of building a CRF that appear to be greatly driven by previous research experience. The process from clinical research experts serves as a valuable example due to its scientific and efficient. It further highlights pitfalls that can be avoided by clinicians who find themselves with little experience, but an expectation for academic productivity.

Based on views from the novice to the expert clinician, the take away messages from this research are:

- (a) **Build the CRF to align closely with the research design, and develop and modify the protocol and template according to the feasibility of collecting data in clinical practice.** The risk of designing a CRF after completing the research protocol, is that some variables might not be feasible to collect as part of the clinical enterprise. The consequence of deviating from the protocol is the



1  
2  
3 risk of compromised research quality. These findings further remind researchers  
4 to be certain to modify the CRF when the research protocol is modified.  
5  
6

7 (b) **Align the CRF with the research protocol.** The variables in the CRF should be  
8 consistent with protocol. That is, all domains and variables mentioned in the  
9 protocol should be included in CRF, to avoid missing any important domains or  
10 variables.  
11  
12

13 (c) **Develop the CRF to be concise and to the point.** In general, variables only  
14 related to the study purpose could be included in the CRF. Unnecessary or  
15 redundant variables can require unnecessary time, effort collecting and  
16 monitoring. This can distract from limited time and energy of researchers to  
17 ensure the quality of key variables in clinical research.  
18  
19  
20  
21  
22

23 (d) **Refine the template to be readily understood and operational.** In the final  
24 template of CRF, every variable should be clear. The structure and order of the  
25 CRF should be consistent with research flow and clinical practice.  
26  
27  
28  
29  
30

### 31 **Strengths, limitations and further research**

32 The strength of this study contribution is a deepened understanding of  
33 omissions that can be made by novice researchers as well as even experienced  
34 researchers, and mechanisms to avoid some pitfalls that can occur in the conduct of  
35 clinical research. The study particularly informs how clinical researchers select  
36 variables in a CRF in their clinical research. In previous research, this question has  
37 been only marginally explored relative to the structure and surface, although it can  
38 play an important role in improving quality of clinical research.  
39  
40  
41  
42  
43  
44  
45

46 Furthermore, based on reports of clinical research experts, these findings illustrate an  
47 overarching and effective process for determining variables for inclusion in a CRF.  
48 Two strategies, the "Top-level Design and concept, and the application of the PICO  
49 framework for thinking about the study represents novel thinking in research design  
50 raised by these experts. Additionally, the complementary ideas of "few to many" and  
51 "many to few" for refining the variables in CRF represents innovative thinking for  
52 CRF design.  
53  
54  
55  
56  
57  
58  
59  
60

1  
2  
3 A limitation of our study concerns the potential selection bias of our sample.  
4  
5 Clinician participants are from a premier academic hospital in Beijing, and these  
6  
7 participants might have greater knowledge, cognitive skills, and opportunities for  
8  
9 research than clinicians in many other hospitals. We both acknowledge the potential  
10  
11 for variations on the findings, while also acknowledging the results are genuine and  
12  
13 representative of the participants' experiences. Despite variations that exist in practice,  
14  
15 we believe the lessons learned based on this study are robust ideas. As noted above,  
16  
17 we initially conducted one group interview with clinicians with limited research, but  
18  
19 for then for feasibility issues changed to individual interviews. It is plausible that  
20  
21 group think may have occurred in the group interview, but there were similar findings.

22  
23 Finally, further studies are needed to assess whether the approaches and  
24  
25 variations described are robust across a wider variety of settings. We are aware of  
26  
27 these limits of the study and to further validate the model by applying it to design of  
28  
29 CRF for clinical research in different levels of hospitals and clinicians from other  
30  
31 settings. None the less, we believe that while there may be additional considerations,  
32  
33 these findings are robust enough for any clinicians engaged in clinical research,  
34  
35 particularly, novice and moderately experienced researchers.

36  
37 **Acknowledgements:** We sincerely appreciate all the participants who made this  
38  
39 research possible.

40  
41 **Funding:** This study was funded by grant 2013BAI09B14 from the Ministry of  
42  
43 Science and Technology of the People's Republic of China. The funders had no role in  
44  
45 the study design, data collection and analysis, decision to publish, or preparation of  
46  
47 the manuscript.

48  
49 **Contributors:** Chu Hongling and Zeng Lin conducted the interviews and all analyses,  
50  
51 wrote the first draft of the manuscript and rewrote new drafts based on input from  
52  
53 co-authors. Michael Feters provided extensive input on the structuring of the  
54  
55 manuscript, and revisions of the manuscript drafts. Zhao Yiming designed the  
56  
57 research project, planned the analyses and provided input and revision of manuscript  
58  
59 drafts. All authors read and approved the final manuscript.  
60

1  
2  
3 **Competing interests:** None to declare.  
4

5 **Participant consent.** Obtained written consent.  
6

7 **Ethics approval:** The Peking University Third Hospital Ethics Review Board  
8  
9 approved the study.  
10

11 **Provenance and peer review:** Not commissioned; externally peer reviewed.  
12

13 **Data sharing statement:** Original quotes and audio data of interviews are available  
14  
15 on request by emailing the corresponding author. The presented data were  
16  
17 anonymized and the risk of identification is low.  
18

19 **Open Access** This is an Open Access article distributed in accordance with the  
20  
21 Creative Commons Attribution Non Commercial (CC BY-NC 4.0) license, which  
22  
23 permits others to distribute, remix, adapt, build upon this work non-commercially, and  
24  
25 license their derivative works on different terms, provided the original work is  
26  
27 properly cited and the use is non-commercial. See: [http://](http://creativecommons.org/licenses/by-nc/4.0/)  
28  
29 [creativecommons.org/licenses/by-nc/4.0/](http://creativecommons.org/licenses/by-nc/4.0/)  
30  
31

## 32 REFERENCE

### 35 References:

- 36  
37 1. Zhao YM, Ding J, Zeng L. Top level design on clinical research. *National Medical Journal of*  
38 *China*. 2010;90(14):942-946. Chinese.
- 39 2. Nahm M, Shepherd J, Buzenberg A, Rostami R, Corcoran A, McCall J, et al. Design and  
40 implementation of an institutional case report form library. *Clin Trials* 2011;8(1):94-102.
- 41 3. Cao AP, Su BH, Ding DY, et al. The case report form in clinical research. *Chinese Journal of*  
42 *Health Statistics*. 2000(03):61-64. Chinese.
- 43 4. Fu, H.J. and X.X. Luo, Key factors in design of case report form. *Yao Xue Xue Bao*, 2015. 50(11):  
44 p. 1452-5. Chinese.  
45 2015(11):1452-1455.
- 46 5. Li QN, Lu F, An FH, Gao R. The design of case report form and analysis of common related  
47 problem. *Chin J Clin Pharmacol Ther* 2013(08):901-906. Chinese.
- 48 6. Li ST. The design of case report form and its importance in drug clinical trials. *Chines Journal of*  
49 *New Drugs* 2004(01):53-55. Chinese.
- 50 7. Li XY, Wen ZH, Tang XC, Liang WX. The principle and process of case report form design in  
51 clinical trials. *Traditional Chinese Drug Research & Clinical Pharmacology* 2013(02):206-209.  
52 Chinese.
- 53 8. Lou H. The design and application of case report form in evidence-based traditional Chinese  
54  
55  
56  
57  
58  
59  
60

1  
2  
3 medicine research. Shandong Traditional Chinese Medicine University, 2015. Chinese.

4 9. Lv XY, Zhang ZL, Ai YK, et al. Talking about the design of case report form from the point of data  
5 management. *Modernization of Traditional Chinese Medicine and Materia-World Science and*  
6 *Technology* 2014(03):614-617. Chinese.

7  
8 10. Wan X, Yang H, Liu JP. The design of case report form in clinical research. *Journal of Traditional*  
9 *Chinese Medicine* 2007(10):885-887. Chinese.

10 11. Wang YH, Jiao YZ. The design of case report form and analysis of related problem in traditional  
11 Chinese medicine research. *China Journal of Traditional Chinese Medicine and Pharmacy*  
12 2005(10):620-623. Chinese.

13 12. Meyer J. Qualitative research in health care. Using qualitative methods in health related action  
14 research. *BMJ* 2000;320(7228):178-81.

15 13. Elo S, Kyngas H. The qualitative content analysis process. *J Adv Nurs* 2008;62(1):107-15.

16 14. Kleijnen J, Chalmers I. How to practice and teach evidence-based medicine: role of the Cochrane  
17 Collaboration. *Acta Anaesthesiol Scand Suppl* 1997;111:231-3.

# BMJ Open

## How Novice, Skilled and Advanced Clinical Researchers Include Variables in a Case Report Form for Clinical Research: A Qualitative Study

|                                 |                                                                                                                                                                                                                                                                                                                                                                                                                                                                                                                                                                                                                                                                                                                                                                                                                                                                                                                             |
|---------------------------------|-----------------------------------------------------------------------------------------------------------------------------------------------------------------------------------------------------------------------------------------------------------------------------------------------------------------------------------------------------------------------------------------------------------------------------------------------------------------------------------------------------------------------------------------------------------------------------------------------------------------------------------------------------------------------------------------------------------------------------------------------------------------------------------------------------------------------------------------------------------------------------------------------------------------------------|
| Journal:                        | <i>BMJ Open</i>                                                                                                                                                                                                                                                                                                                                                                                                                                                                                                                                                                                                                                                                                                                                                                                                                                                                                                             |
| Manuscript ID                   | bmjopen-2017-016760.R1                                                                                                                                                                                                                                                                                                                                                                                                                                                                                                                                                                                                                                                                                                                                                                                                                                                                                                      |
| Article Type:                   | Research                                                                                                                                                                                                                                                                                                                                                                                                                                                                                                                                                                                                                                                                                                                                                                                                                                                                                                                    |
| Date Submitted by the Author:   | 05-Jul-2017                                                                                                                                                                                                                                                                                                                                                                                                                                                                                                                                                                                                                                                                                                                                                                                                                                                                                                                 |
| Complete List of Authors:       | <p>Chu, Hongling; Peking University Third Hospital, Research Center of Clinical Epidemiology</p> <p>Zeng, Lin; Peking University Third Hospital, Research Center of Clinical Epidemiology</p> <p>Fetters, Micheal; University of Michigan Department of Family Medicine</p> <p>Li, Nan; Peking University Third Hospital, Research Center of Clinical Epidemiology</p> <p>Tao, Liyuan; Peking University Third Hospital, Research Center of Clinical Epidemiology</p> <p>Shi, Yanyan; Peking University Third Hospital, Research Center of Clinical Epidemiology</p> <p>Zhang, Hua; Peking University Third Hospital, Research Center of Clinical Epidemiology</p> <p>Wang, Xiaoxiao; Peking University Third Hospital, Research Center of Clinical Epidemiology</p> <p>Li, Fengwei; Beijing Aerospace General Hospital</p> <p>zhao, yiming; Peking University Third Hospital, Research Center of Clinical Epidemiology</p> |
| <b>Primary Subject Heading</b>: | Qualitative research                                                                                                                                                                                                                                                                                                                                                                                                                                                                                                                                                                                                                                                                                                                                                                                                                                                                                                        |
| Secondary Subject Heading:      | Research methods, Qualitative research                                                                                                                                                                                                                                                                                                                                                                                                                                                                                                                                                                                                                                                                                                                                                                                                                                                                                      |
| Keywords:                       | QUALITATIVE RESEARCH, clinical study, data collection, research design                                                                                                                                                                                                                                                                                                                                                                                                                                                                                                                                                                                                                                                                                                                                                                                                                                                      |
|                                 |                                                                                                                                                                                                                                                                                                                                                                                                                                                                                                                                                                                                                                                                                                                                                                                                                                                                                                                             |

SCHOLARONE™  
Manuscripts

1  
2  
3  
4  
5  
6  
7  
8  
9  
10  
11  
12  
13  
14  
15  
16  
17  
18  
19  
20  
21  
22  
23  
24  
25  
26  
27  
28  
29  
30  
31  
32  
33  
34  
35  
36  
37  
38  
39  
40  
41  
42  
43  
44  
45  
46  
47  
48  
49  
50  
51  
52  
53  
54  
55  
56  
57  
58  
59  
60

**How Novice, Skilled and Advanced Clinical Researchers Include  
Variables in a Case Report Form for Clinical Research:  
A Qualitative Study**

**Chu Hongling, Zeng Lin, Michael D Fetters, Li Nan, Tao Liyuan, Shi Yanyan,  
Zhang Hua, Wang Xiaoxiao, Li Fengwei, Zhao Yiming**

**Corresponding author:** Zhao Yiming, Peking University Third Hospital, Research  
Center of Clinical Epidemiology, 49#, Huayuanbei Road, Haidian District Beijing,  
P.R.China 100191. [yimingzhao115@163.com](mailto:yimingzhao115@163.com), +86-010-82266577,  
+86-010-82265732.

**Chu Hongling, Zeng Lin, Li Nan, Tao Liyuan, Shi Yanyan, Zhang Hua, Wang  
Xiaoxiao, Zhao Yiming:** Peking University Third Hospital, Research Center of  
Clinical Epidemiology, Beijing, China.

**Michael D Fetters:** University of Michigan Department of Family Medicine, Ann  
Arbor, MI, US.

**Li Fengwei:** Beijing Aerospace General Hospital, Beijing, China.

**Abstract**

**Objectives:** Despite varying degrees in research training, most academic clinicians  
are expected to conduct clinical research. The objective of this research was to  
understand how clinical researchers of different skill levels include variables in a case  
report form for their clinical research.

**Setting:** The setting for this research was a major academic institution in Beijing,  
China.

**Participants:** The target population was clinical researchers with three levels of  
experience, namely, limited clinical research experience, clinicians with rich clinical

1  
2  
3 research experience and clinical research experts.

4  
5 **Methods:** Using a qualitative approach, we conducted 13 individual interviews (face-  
6  
7 to-face) and one group interview (n=4) with clinical researchers from June to  
8  
9 September 2016. Based on maximum variation sampling to identify researchers with  
10  
11 three levels of research experience: 8 clinicians with limited clinical research  
12  
13 experience, 5 clinicians with rich clinical research experience, and 4 clinical research  
14  
15 experts. These 17 researchers had diverse hospital-based medical specialties and or  
16  
17 specialization in clinical research.

18  
19 **Results:** Our analysis yields a typology of three processes developing a case report  
20  
21 form that varies according to research experience level. Novice clinician researchers  
22  
23 often have an incomplete protocol or none at all, and conduct data collection and  
24  
25 publication based on a general framework. Experienced clinician researchers include  
26  
27 variables in the case report form based on previous experience with attention to  
28  
29 including domains or items at risk for omission, and by eliminating unnecessary  
30  
31 variables. Expert researchers consider comprehensively in advance data collection and  
32  
33 implementation needs and plan accordingly.

34  
35 **Conclusion:** These results illustrate increasing levels of sophistication in research  
36  
37 planning that increase sophistication in selection for variables in the case report form.  
38  
39 These findings suggest that novice and intermediate-level researchers could benefit by  
40  
41 emulating the comprehensive planning procedures such as those utilized by expert  
42  
43 clinical researchers.

44  
45 **Keywords:** qualitative research; clinical study; data collection, research design

## 46 47 **Article summary**

### 48 49 **Strengths and limitations of this study**

- 50  
51 • The study used qualitative interviews to explore the novel topic of how  
52  
53 researchers create a case report form.
- 54  
55 • The study involved the development of three visual models to depict the  
56  
57 approach of novice, excellent, and expert clinical researchers
- 58  
59 • The expert clinical researchers shared guiding principles they use to conduct  
60

1  
2  
3 research.

- 4  
5 • A limitation of our study concerns the potential selection bias of our sample as  
6 clinician participants are from a premier academic hospital in Beijing, and  
7 these participants might have greater knowledge, cognitive skills, and  
8 opportunities for research than clinicians in many other hospitals in China.  
9  
10  
11

## 12 13 14 INTRODUCTION

15  
16  
17  
18 Conducting clinical research is a multistage process. It can be divided into three  
19 stages: the first stage is top-level design, the second stage is protocol design and  
20 implementation, the third stage is conducting data analysis, interpretation and writing  
21 of the paper<sup>1</sup>. During the first two stages, researchers should consider what variables  
22 are important, and how to collect the data.  
23  
24

25  
26  
27 A case report form (CRF) is an instrument to structure and facilitate collection of  
28 data for clinical research<sup>2</sup>. Most CRFs are customized to collect data specific to a  
29 particular clinical study protocol. Case report form development represents a  
30 significant part of the clinical trial process and can impact study success. A  
31 well-designed CRF is required for database construction, data accuracy, data  
32 query/cleaning, CRF completion and statistical analysis.  
33  
34  
35

36  
37  
38 In our institution, to facilitate greater clinical research efficiency, our lab became  
39 interested in how to develop an approach to build a CRF. Our interest extended to  
40 both the structure and variables of the CRF. The structure has been the topic of  
41 concern among some researchers<sup>3-11</sup>. In one published paper, Li et al. emphasize that  
42 the design of CRF needs the cooperation and efforts of each member of the study  
43 group<sup>7</sup>. In another related paper, Wan et al note that the CRF should keep privacy for  
44 participants, include a tracked page or modules, and some other fields on forms<sup>10</sup>.  
45 However, the question about what variables should be included in CRF has received  
46 less consideration despite its crucial role in the quality of clinical research.  
47  
48  
49

50  
51  
52 The goal of this qualitative research study was to explore how clinical  
53 researchers select variables for a CRF, and was part of a larger mixed-methods project  
54  
55  
56



1  
2  
3 to develop an approach for clinical researchers to build systematic variables for  
4 clinical research. These findings of this research could provide an approach for  
5 choosing variables in a CRF by clinical researchers. This can serve as a reference to  
6 other researchers, and lay a foundation for further inquiry into what variables to  
7 include in a CRF.  
8  
9  
10  
11  
12

## 13 14 15 **METHOD**

16 Qualitative inquiry is an approach particularly useful when little is known about  
17 the phenomenon under study<sup>12</sup>. As little is known about how clinicians determine  
18 variables to include in a CRF we deemed a qualitative approach as useful.  
19  
20  
21

### 22 **Setting:**

23 The setting for this research was a heavily research-focused major academic  
24 institution in Beijing, China.  
25  
26  
27

### 28 **Study Population:**

29 These hospitals are host to over 1000 faculty, and to some degree there is an  
30 expectation, or hope that all will engage in clinical research at some level. Purposive  
31 sampling was used in this study. The target population was clinical researchers with  
32 three levels of experience, namely, limited clinical research experience, clinicians  
33 with rich clinical research experience and clinical research experts. Seventeen clinical  
34 researchers chose to participate in this study.  
35  
36  
37  
38  
39  
40

### 41 **Data collection instrument:**

42 A semi-structured interview guide was first developed based on a group  
43 discussion and a preliminary pilot study with 2 clinical researchers. The primary  
44 interview questions developed to generate data for the study was, “What process do  
45 you use to design a case report form for clinical research?” Key probes were, “What  
46 are the difficulties and challenges encountered when you designed case report form  
47 for your project?” and “What is your previous experience joining a clinical research  
48 project?” The overall interview guide was designed for a study looking  
49 comprehensively at clinical researchers’ approaches to data collection and thus had  
50 additional questions in the interview guide as well.  
51  
52  
53  
54  
55  
56  
57  
58  
59  
60

**Recruitment:**

Individuals targeted for enrollment were contacted by email by a research assistant. We used maximum variation sampling to identify individuals with different degrees of research experience and different medical specialties in the project's host academic institution, a teaching hospital and clinical research institute in Beijing.

The inclusion criteria were:

- a. Meet one of the following conditions: 1) Clinicians with limited clinical research experience who were defined as rarely participating in clinical research, a criterion operationalized as no experience to one experience designing a CRF for clinical research; 2) clinicians with rich clinical research experience defined as researchers with experience participating in several clinical research studies and experience designing three to nine data collection reforms or case report forms for clinical research. 3) Clinical research experts defined as researchers with experience in clinical research for five years or more, and participation directly in 10 or more clinical research projects.
- b. Being willing to participate in the study.

**Data collection**

Two research assistants (RAs), both females with a PhD, conducted interviews from June to September in 2016. The RAs first conducted one focus group interview with clinicians who had limited experience in clinical research. As gathering busy clinicians for focus group interviews proved difficult, the RAs changed to face-to-face semi-structured in-depth interviews with an additional nine clinicians and four clinical research experts. The same questions were posed in the same order to all the participants, whether the interviews were conducted in the focus group or individual interviews. One question was added for the four clinical research experts, namely, "What have you encountered when you directed other clinical researchers' project". The interviews lasted between (25-40) minutes and were conducted in a location that was quiet without interruption, either the participant's office or the interviewee's conference room. All interviews were audio-recorded and transcribed verbatim into

1  
2  
3 Chinese. Data collection was complete after 17 interviews, the point when saturation  
4 of themes was reached.  
5  
6  
7

### 8 9 **Data analysis**

10 The transcribed data were analyzed in Chinese using thematic analysis with an  
11 inductive approach. Nvivo 11 was used to assist in the analysis of the data. Two  
12 researchers (CH and ZI) independently coded and analyzed the transcripts by:  
13 selecting the units of analysis, making sense of the transcribed data, developing codes,  
14 categorizing the data and abstracting<sup>13</sup>. The analysis focused on text from the four  
15 primary questions noted above but also used related information from other interview  
16 guide questions and context-specific language probes. The analysts discussed and  
17 reached an agreement on the coding and categorization after reviewing one interview.  
18 The two researchers independently coded the remaining transcripts. Differences were  
19 minimal. All research team members agreed with the final results. After constructing  
20 the models, the team confirmed the findings by checking the results with the  
21 interviews transcript. Member checking was used to share the results with all the  
22 interviewees by email--they raised no objections or new considerations, and agreed  
23 with the findings.  
24  
25  
26  
27  
28  
29  
30  
31  
32  
33  
34  
35  
36

37 Below, the findings of the study are presented by illustrating the three identified  
38 models and illustrative quotes from the interviews. The researchers who conducted  
39 the data collection and analysis translated the quotes selected for this article into  
40 English. Original quotes are available upon request.  
41  
42  
43  
44  
45  
46

### 47 **Ethical considerations**

48 Each participant was informed about the study procedures and was free to  
49 withdraw from the research. All participants provided consent to participate in the  
50 study including audiotaping and transcription of the interviews by providing written  
51 informed consent. Potentially identifying information was removed from each  
52 transcript and each interviewee was assigned a unique identification number to protect  
53 his/her anonymity. The institutional review board (IRB) at Peking University Third  
54  
55  
56  
57  
58  
59  
60

Hospital approved the study.

## RESULTS

The 17 clinical researchers had diverse backgrounds, including otolaryngology, pharmacy, endocrinology, orthopedics, anesthesia, radiology, neurology, cardiology, nephrology, Hematology, thoracic surgery, epidemiology and biostatistics, clinical epidemiology, clinical research data management, and clinical research methodology.

(Table1)

**Table 1 Demographics of the participants**

| Participants level                         | Clinicians with limited clinical research experience                                                  | Clinicians with rich clinical research experience        | Clinical research experts                     |
|--------------------------------------------|-------------------------------------------------------------------------------------------------------|----------------------------------------------------------|-----------------------------------------------|
| Number                                     | 8                                                                                                     | 5                                                        | 4                                             |
| Gender                                     |                                                                                                       |                                                          |                                               |
| Male (N)                                   | 2                                                                                                     | 2                                                        | 3                                             |
| Female (N)                                 | 6                                                                                                     | 3                                                        | 1                                             |
| Average age (mean $\pm$ SD)                | 27 $\pm$ 4                                                                                            | 35 $\pm$ 2                                               | 44 $\pm$ 12                                   |
| Department                                 | Otolaryngology, Pharmacy, Endocrinology, Orthopedics, Anesthesia, Radiology, Neurologist, Cardiology. | Nephrology, Otolaryngology, Thoracic surgery, Hematology | Epidemiology Or Clinical research methodology |
| Experience in clinical research (projects) | Participating in clinical research work for 1-3 years                                                 | Being involved in 5-12 clinical research projects        | Working in clinical research for 11-20 years  |
| Data collection                            | 4 semi-structured in-depth interviews, and 1 focus group interview for 4 clinicians                   | Semi-structured in-depth interviews                      | Semi-structured in-depth interviews           |

### **A typology of how clinical researchers of different skill levels include variables in CRF for clinical research**

Based on our analysis, we developed a typology of how clinical researchers of different skill levels select variables in a CRF for clinical research. These three

1  
2  
3 models are illustrated as Figures 1, 2, and 3. The findings are supported by quoted  
4 comments from the research participants. The models are illustrated using a flow  
5 chart showing the different process for each of three levels of the participants, e.g.,  
6 novice clinicians with limited clinical research experience, intermediate-level  
7 clinicians with rich clinical research experience, and clinical research experts.  
8  
9

10  
11  
12  
13 **a. The novice clinical researcher's approach to selecting variables in a CRF**  
14 **for clinical research.**

15  
16 Novice clinicians with limited clinical research experience described a  
17 multi-faceted approach to selecting variables for inclusion in their CRFs. When they  
18 planned the variables to include in their CRFs, most had no clearly defined  
19 comprehensive approach.  
20  
21  
22

23  
24 **Finding the template from similar research and imitating it.** Most novice  
25 clinical researchers mentioned that they would find a similar data collection form for  
26 reference and modify it according to the needs of their own study. As one  
27 endocrinologist noted, “First, I search on the Internet to find a template from similar  
28 research, then I modify the template based on my research”. One otolaryngology  
29 clinician opined, “I ask for a data collection template from other experienced  
30 researchers in my department. I then imitate the template to make my own data  
31 collection template, and modify it in places according my research.” An Orthopedics  
32 clinician reflected his opinion that most novice clinical researchers are doing like this,  
33 “I will imitate another data collection template, then copy what is applicable to my  
34 research, and modify those variables that are not applicable. I think most of us are  
35 doing like this, because it is easier for us.”  
36  
37  
38  
39  
40  
41  
42  
43  
44  
45

46  
47 **Discussing with clinicians with rich clinical research experience.** Some  
48 novice clinical researchers reported discussing the CRF with experienced clinical  
49 researchers. One participant recounted, “I discussed the CRF with clinicians with rich  
50 experience in clinical research. They deleted useless items directly.”  
51  
52  
53

54  
55 **Modifying again if any problems are found during use.** Some novice clinical  
56 researchers directly used the data collection form without a pilot study, and modified  
57 it only when they found problems during use. An anesthesia clinician said, “When the  
58  
59  
60

1  
2  
3 CRF is used to collect data in a clinical research project, some variables are found not  
4 to be applicable or absent. In this case, I always think about it and then modify/add  
5 the variables.” Another cardiology clinician also remarked, “When I use the CRF to  
6 collect data from the first few participants, I find some variables can’t get data at all.  
7 So I realize that these variables also can’t get data from other participants, and these  
8 variables can contribute little to my research. Then I delete them.”  
9

10  
11 The following flow chart was refined from the above in-depth interviews with  
12 four clinicians and a group interview with another four clinicians.  
13

14  
15 **Figure 1. Novice clinical researchers' approach to developing a CRF for clinical**  
16 **research**  
17

18  
19 **b. The experienced clinical researcher's approach to selecting variables in a**  
20 **CRF for clinical research.**  
21

22  
23 Experienced clinical researchers also described a multi-faceted approach for how  
24 they include variables in a CRF. Most of them have a clear purpose and protocol  
25 firstly, and think about the importance, feasibility and statistics of these variables  
26 according to their experience in clinical research.  
27

28  
29 **Confirming the purpose and protocol.** These clinical researchers first concern  
30 themselves with confirming the purpose and developing a protocol before designing  
31 the CRF. For example, a nephrologist said, “First, you should confirm the purpose of  
32 your study, disease features or prognosis, follow-up study or cross-sectional study.”  
33  
34

35  
36 **Conducting a literature search for references and related materials.** Most of  
37 the experienced clinical researchers would review the literature and related materials  
38 to consider the variables for inclusion in the CRF. “I think searching the related  
39 literature and other references is important. You can find many variables mentioned in  
40 other’s research. You also can list all the related items for reference.”  
41  
42

43  
44 **Finding a template from similar research and intimating it.** Experienced  
45 clinical researchers also find a template to imitate for their own study. However, they  
46 consider the variables according to the research protocol, literature and their previous  
47 experience. One hematologist explained, “(I) search materials first, then find a  
48  
49  
50  
51

1  
2  
3  
4  
5  
6  
7  
8  
9  
10  
11  
12  
13  
14  
15  
16  
17  
18  
19  
20  
21  
22  
23  
24  
25  
26  
27  
28  
29  
30  
31  
32  
33  
34  
35  
36  
37  
38  
39  
40  
41  
42  
43  
44  
45  
46  
47  
48  
49  
50  
51  
52  
53  
54  
55  
56  
57  
58  
59  
60

template from the literature or similar research previously conducted in my department. Then I imitate the template to make CRF for my project, and optimize and perfect the CRF according to the research protocol.”

**Consider the importance, feasibility and statistics of fields.** The experienced clinical researchers note that the importance, feasibility and statistical analysis of collected variables should be considered before deciding whether to collect the data in the first place. One hematologist said, “Even if we do the optimizing and perfecting, we can also find many problems when we use it to collect data in clinical research. We can just modify it again and again. In the final version, many variables are deleted that are not easy to collect, or not very clear, or have little relationship with the primary outcome.”

**Conduct a pilot study and modify the CRF.** These experienced researchers also note that piloting the CRF before using it to collect data is very important. If any problems are found in the pilot study, the problem can be resolved in a timely way. A thoracic surgeon shared, “A pilot study was conducted after the draft CRF was completed. We then recruited some patients to complete it. We found that some items or scales could not be completed. For example, the tinnitus handicap inventory is too complex for patients. And it is not very important for the final evaluation about the treatment, so we deleted it in follow-up visits.”

The flow chart depicted in Figure 2 illustrates the overall steps employed by these experienced clinicians based on their interviews.

**Figure 2. Experienced clinical researcher's approach to selecting variables in a CRF for clinical research.**

**c. The clinical research experts' approach to selecting variables in a CRF for clinical research.**

Clinical research experts described their multi-faceted approach to identifying variables for inclusion in a CRF or how they help other researchers design a CRF. They would consider the study comprehensively, and they raised some different and crucial views.

1  
2  
3  
4  
5  
6  
7  
8  
9  
10  
11  
12  
13  
14  
15  
16  
17  
18  
19  
20  
21  
22  
23  
24  
25  
26  
27  
28  
29  
30  
31  
32  
33  
34  
35  
36  
37  
38  
39  
40  
41  
42  
43  
44  
45  
46  
47  
48  
49  
50  
51  
52  
53  
54  
55  
56  
57  
58  
59  
60

**Confirming the clinical and scientific issues, hypotheses, and research protocol.** A clear research question and hypotheses are essential before you consider which variables should be included in the CRF. One expert working in the epidemiology research center stated, “First, you complete the top-level design of the clinical research to confirm the clinical issues, scientific issues and hypotheses, and then confirm the research purpose and protocol.”

**PICO model is considered to build the causality model.** The PICO Model is a format used to help define the clinical research question. P stands for Patient /Population/problem; I stands for Intervention/Prognostic factor /Exposure; C stands for Comparison; O stands for Outcome sought to measure or achieve<sup>14</sup>. The PICO model as commonly used in evidence-based medicine, can be employed to build a causality model and clearly confirm the related variables in the CRF. Another clinical research expert working in the epidemiology research center explained, “In clinical research, you need to confirm the PICO, and build the causality model based on the PICO model. Then confirm the primary outcome and secondary outcome based on O (outcome) in PICO model.” “You need to document the domains based on the PICO model. These domains include but are not limited to population characteristics, intervention or exposure and related outcome, and related confounding factors affecting the causality between the intervention and outcome.”

**What's more, “few to many” and “many to few” are used to list and screen domains and variables in the research.** Many clinical researchers worry about omitting key variables in the CRF, so they often list as many variables as possible. However, many variables are not necessary, and the added burden of collecting these data, may even lower the quality of key variables. One expert in the clinical research institute emphasized that, “From less to more’, you need to list variables from all domains as much as possible through multiple ways such as clinical practice experience and literature. ‘Many to few’, we should organize related experts including clinicians, statisticians, data manager and experts on clinical research design to discuss the necessity and feasibility of all the domains and variables. It should be considered in terms of accuracy, sensitivity and difficulty of detection and collection,



1  
2  
3 statistics, ethical problems, cost, quality control and so on.” The flow chart depicted  
4 in Figure 3 illustrates the overall steps used by these 4 clinical research experts.  
5  
6  
7

8  
9 **Figure 3. The expert clinical researcher's approach to selecting variables in a**  
10 **CRF for clinical research**  
11

12  
13  
14  
15  
16  
17 **DISCUSSION**

18 This qualitative study reveals a different process of selecting variables for  
19 inclusion in a CRF for clinical research among three different levels of clinical  
20 researchers. Novice, experienced and expert clinical researchers have progressively  
21 sophisticated approaches for selecting variables in a CRF for clinical research. The  
22 novice clinician researcher approach of finding a template, modifying it according to  
23 their own study, reviewing it with clinicians with rich clinical research experience,  
24 and then completing the CRF when collecting data can be problematic. This process  
25 can truncate thinking about the whole protocol, study purpose, statistics, etc., and  
26 risks compromising the study quality. This point is consistent with previous  
27 discussion of Ionnides et al<sup>15</sup> that research in a previously understudied domain might  
28 supply too little information to be useful. The resulting risk is, small uninformative  
29 studies that remain common in several specialties.  
30  
31  
32  
33  
34  
35  
36  
37  
38  
39

40 Relative to the existing literature about the development of CRFs, this research  
41 has expanded understanding about what variables should be included in a CRF,  
42 procedures used by expert researchers for first exploding, and then limiting the range  
43 of variables to be studied. The notion of “few to many” and “many to few” to first  
44 comprehensively generate, then severely truncate to limit the domains is similar to  
45 previous advice. Li et al suggest collecting data so as to be able to just answer the  
46 scientific issues or hypothesis, nothing more and nothing less<sup>7</sup>.  
47  
48  
49  
50  
51  
52  
53

54 Based on views from the novice to the expert clinician, the take away message  
55 from this research is that increasing levels of sophistication in research planning  
56 reflect increasing levels of sophisticated selection of variables on the case report form.  
57  
58  
59  
60

1  
2  
3 As alluded to by Chalmers et al, there are several principles that can help guide  
4  
5 clinical researchers to conduct efficient and high quality studies<sup>16</sup>:  
6

- 7  
8  
9  
10  
11  
12  
13  
14  
15  
16  
17  
18  
19  
20  
21  
22  
23  
24  
25  
26  
27  
28  
29  
30  
31  
32  
33  
34  
35  
36  
37  
38  
39  
40  
41  
42  
43  
44  
45  
46  
47  
48  
49  
50  
51  
52  
53  
54  
55  
56  
57  
58  
59  
60
- (a) **Build the CRF to align closely with the research design, and develop and modify the protocol and template according to the feasibility of collecting data in clinical practice.** The risk of designing a CRF after completing the research protocol, is that some variables might not be feasible to collect as part of the clinical enterprise. The consequence of deviating from the protocol is the risk of compromised research quality. These findings further remind researchers to be certain to modify the CRF when the research protocol is modified.
- (b) **Align the CRF with the research protocol.** The variables in the CRF should be consistent with protocol. That is, all domains and variables mentioned in the protocol should be included in CRF, to avoid missing any important domains or variables.
- (c) **Develop the CRF to be concise and to the point.** In general, variables only related to the study purpose could be included in the CRF. Unnecessary or redundant variables can require unnecessary time, effort collecting and monitoring. This can distract from limited time and energy of researchers to ensure the quality of key variables in clinical research. Berge et al also identify that data collection forms can be too complex and burden centers with a requirement to collect data items that are never analyzed or reported<sup>17</sup>.
- (d) **Refine the template to be readily understood and operational.** In the final template of CRF, every variable should be clear. The structure and order of the CRF should be consistent with research flow and clinical practice.

These findings speak to fundamentals of conducting high quality research, and while based on research in a single institution, can reasonably be expected to hold true in a broad range of settings.

A potential limitation of our study concerns the risk of selection bias of our sample. Clinician participants are from a premier academic hospital in Beijing, and these participants might have greater knowledge, cognitive skills, and opportunities for research than clinicians in many other hospitals. We acknowledge the potential for

1  
2  
3 variations on the findings in other settings, while also acknowledging the results are  
4 genuine and representative of the participants' experiences. Despite variations that  
5 exist in practice, we believe the lessons learned based on this study are transferable  
6 and robust ideas. Another potential limitation is that the interviewers were aware of  
7 the interviewed researchers' experience and the study hypotheses, and this could raise  
8 concern about confirmation bias, however the models were built and reviewed by the  
9 researchers themselves and this suggests that the processes delineated represent their  
10 views.  
11

12  
13 Further studies are needed to assess whether the approaches and variations  
14 described are robust across a wider variety of settings. The proposed expert model  
15 could be further validated by applying it to design of CRF for clinical research in  
16 different levels of hospitals and clinicians from other settings. Regardless, we believe  
17 that while there may be additional considerations, these findings are a robust and  
18 meaningful reference for any clinicians engaged in clinical research, and particularly,  
19 novice and moderately experienced researchers who wish to learn lessons from  
20 experts.  
21

22  
23 In conclusion, this research illustrates that increasing levels of sophistication in  
24 research planning reflect increasing levels of sophistication in the selection of  
25 variables for inclusion in as case report form. Thus, novice and intermediate-level  
26 clinical researchers alike could benefit by emulating the comprehensive planning  
27 procedures utilized by expert clinical researchers.  
28

29  
30 **Acknowledgements:** We sincerely appreciate all the participants who made this  
31 research possible.  
32

33  
34 **Funding:** This study was funded by grant 2013BAI09B14 from the Ministry of  
35 Science and Technology of the People's Republic of China. The funders had no role in  
36 the study design, data collection and analysis, decision to publish, or preparation of  
37 the manuscript.  
38

39  
40 **Contributors:** Chu Hongling and Zeng Lin conducted the interviews and all analyses,  
41 wrote the first draft of the manuscript and rewrote new drafts based on input from  
42 co-authors. Michael Feters provided extensive input on the structuring of the  
43  
44  
45  
46  
47  
48  
49  
50  
51  
52  
53  
54  
55  
56  
57  
58  
59  
60

1  
2  
3 manuscript, and revisions of the manuscript drafts. Zhao Yiming designed the  
4 research project, planned the analyses and provided input and revision of manuscript  
5 drafts. All authors read and approved the final manuscript.  
6  
7

8  
9 **Competing interests:** None to declare.

10  
11 **Participant consent.** Obtained written consent.

12  
13 **Ethics approval:** The Peking University Third Hospital Ethics Review Board  
14 approved the study.

15  
16 **Provenance and peer review:** Not commissioned; externally peer reviewed.

17  
18 **Data sharing statement:** Original quotes and audio data of interviews are available  
19 on request by emailing the corresponding author. The presented data were  
20 anonymized and the risk of identification is low.  
21

22  
23 **Open Access** This is an Open Access article distributed in accordance with the  
24 Creative Commons Attribution Non Commercial (CC BY-NC 4.0) license, which  
25 permits others to distribute, remix, adapt, build upon this work non-commercially, and  
26 license their derivative works on different terms, provided the original work is  
27 properly cited and the use is non-commercial. See: [http://](http://creativecommons.org/licenses/by-nc/4.0/)  
28  
29  
30  
31  
32  
33  
34  
35  
36  
37  
38  
39  
40  
41  
42  
43  
44  
45  
46  
47  
48  
49  
50  
51  
52  
53  
54  
55  
56  
57  
58  
59  
60  
[creativecommons.org/licenses/by-nc/4.0/](http://creativecommons.org/licenses/by-nc/4.0/)

### References:

1. Zhao YM, Ding J, Zeng L. Top level design on clinical research. National Medical Journal of China. 2010;90(14):942-946. Chinese.
2. Nahm M, Shepherd J, Buzenberg A, Rostami R, Corcoran A, McCall J, et al. Design and implementation of an institutional case report form library. *Clin Trials* 2011;8(1):94-102.
3. Cao AP, Su BH, Ding DY, et al. The case report form in clinical research. Chinese Journal of Health Statistics. 2000(03):61-64. Chinese.
4. Fu, H.J. and X.X. Luo, Key factors in design of case report form. Yao Xue Xue Bao, 2015. 50(11): p. 1452-1455. Chinese.
5. Li QN, Lu F, An FH, Gao R. The design of case report form and analysis of common related problem. *Chin J Clin Pharmacol Ther* 2013(08):901-906. Chinese.
6. Li ST. The design of case report form and its importance in drug clinical trials. *Chines Journal of New Drugs* 2004(01):53-55. Chinese.
7. Li XY, Wen ZH, Tang XC, Liang WX. The principle and process of case report form design in clinical trials. *Traditional Chinese Drug Research & Clinical Pharmacology* 2013(02):206-209. Chinese.
8. Lou H. The design and application of case report form in evidence-based traditional Chinese medicine research. Shandong Traditional Chinese Medicine University, 2015. Chinese.

- 1
  - 2
  - 3
  - 4
  - 5
  - 6
  - 7
  - 8
  - 9
  - 10
  - 11
  - 12
  - 13
  - 14
  - 15
  - 16
  - 17
  - 18
  - 19
  - 20
  - 21
  - 22
  - 23
  - 24
  - 25
  - 26
  - 27
  - 28
  - 29
  - 30
  - 31
  - 32
  - 33
  - 34
  - 35
  - 36
  - 37
  - 38
  - 39
  - 40
  - 41
  - 42
  - 43
  - 44
  - 45
  - 46
  - 47
  - 48
  - 49
  - 50
  - 51
  - 52
  - 53
  - 54
  - 55
  - 56
  - 57
  - 58
  - 59
  - 60
9. Lv XY, Zhang ZL, Ai YK, et al. Talking about the design of case report form from the point of data management. *Modernization of Traditional Chinese Medicine and Materia-World Science and Technology* 2014(03):614-617. Chinese.
10. Wan X, Yang H, Liu JP. The design of case report form in clinical research. *Journal of Traditional Chinese Medicine* 2007(10):885-887. Chinese.
11. Wang YH, Jiao YZ. The design of case report form and analysis of related problem in traditional Chinese medicine research. *China Journal of Traditional Chinese Medicine and Pharmacy* 2005(10):620-623. Chinese..
12. Meyer J. Qualitative research in health care. Using qualitative methods in health related action research. *BMJ* 2000;320(7228):178-81.
13. Elo S, Kyngas H. The qualitative content analysis process. *J Adv Nurs* 2008;62(1):107-15.
14. Kleijnen J, Chalmers I. How to practice and teach evidence-based medicine: role of the Cochrane Collaboration. *Acta Anaesthesiol Scand Suppl* 1997;111:231-3.
15. Ioannidis JP, Greenland S, Hlatky MA, Khoury MJ, Macleod MR, Moher D, et al. Increasing value and reducing waste in research design, conduct, and analysis. *Lancet* 2014;383(9912):166-75.
16. Chalmers I, Bracken MB, Djulbegovic B, Garattini S, Grant J, Gulmezoglu AM, et al. How to increase value and reduce waste when research priorities are set. *Lancet* 2014;383(9912):156-65.
17. Berge E, Salman RA, van der Worp HB, Stapf C, Sandercock P, Sprigg N, et al. Increasing value and reducing waste in stroke research. *Lancet Neurol* 2017;16(5):399-408.

1  
2  
3  
4  
5  
6  
7  
8  
9  
10  
11  
12  
13  
14  
15  
16  
17  
18  
19  
20  
21  
22  
23  
24  
25  
26  
27  
28  
29  
30  
31  
32  
33  
34  
35  
36  
37  
38  
39  
40  
41  
42  
43  
44  
45  
46  
47  
48  
49  
50  
51  
52  
53  
54  
55  
56  
57  
58  
59  
60

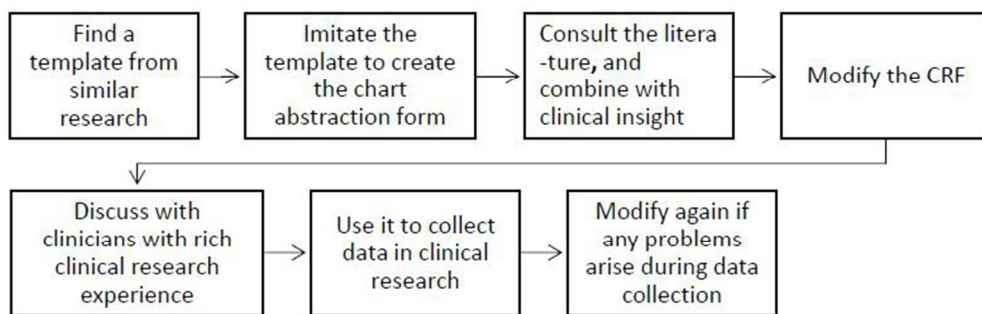

Figure 1. Novice clinical researchers' approach to developing a CRF for clinical research

67x21mm (300 x 300 DPI)

peer review only

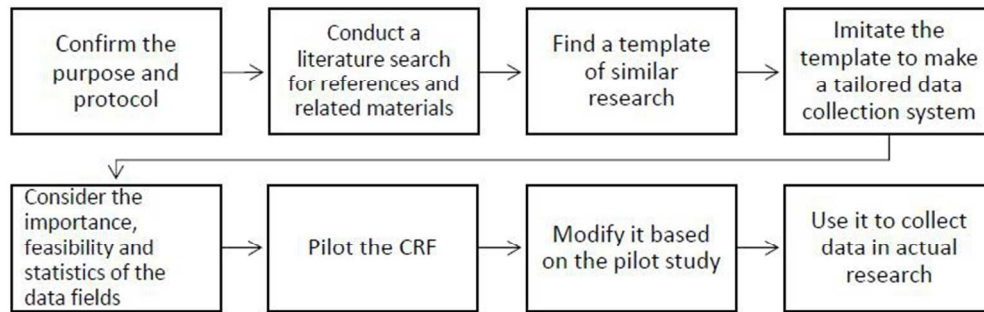

Figure 2. Experienced clinical researcher's approach to selecting variables in a CRF for clinical research.

68x22mm (300 x 300 DPI)

peer review only

1  
2  
3  
4  
5  
6  
7  
8  
9  
10  
11  
12  
13  
14  
15  
16  
17  
18  
19  
20  
21  
22  
23  
24  
25  
26  
27  
28  
29  
30  
31  
32  
33  
34  
35  
36  
37  
38  
39  
40  
41  
42  
43  
44  
45  
46  
47  
48  
49  
50  
51  
52  
53  
54  
55  
56  
57  
58  
59  
60

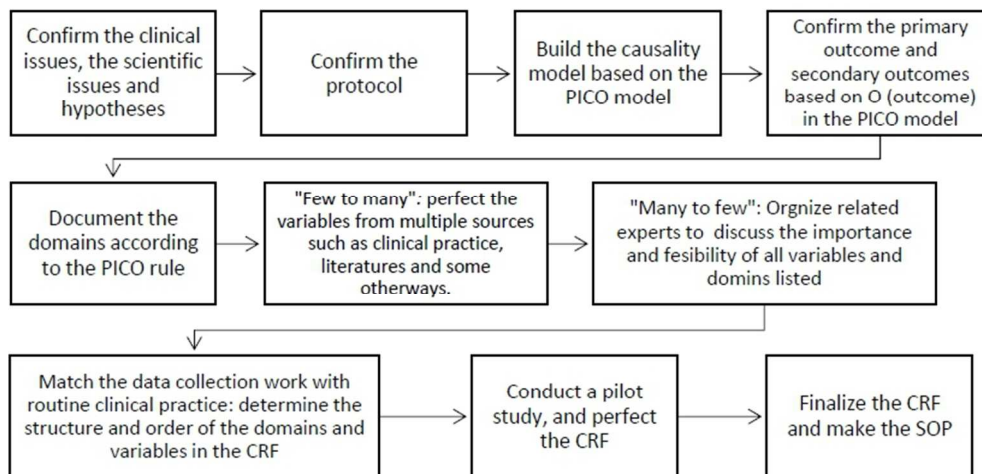

Figure 3. The expert clinical researcher's approach to selecting variables in a CRF for clinical research

70x34mm (300 x 300 DPI)

For peer review only



| <b>Consolidated criteria for reporting qualitative studies (COREQ): 32-item checklist</b> |                                                                                                                                                          |                    |
|-------------------------------------------------------------------------------------------|----------------------------------------------------------------------------------------------------------------------------------------------------------|--------------------|
| <b>No Item</b>                                                                            | <b>Guide questions/description</b>                                                                                                                       | <b>Page number</b> |
| <b>Domain 1: Research team and reflexivity</b>                                            |                                                                                                                                                          |                    |
| <b>Personal Characteristics</b>                                                           |                                                                                                                                                          |                    |
| 1. Interviewer/facilitator                                                                | Which author/s conducted the interview or focus group?                                                                                                   | 5                  |
| 2. Credentials                                                                            | What were the researcher's credentials? E.g. PhD, MD                                                                                                     | 5                  |
| 3. Occupation                                                                             | What was their occupation at the time of the study?                                                                                                      | 5                  |
| 4. Gender                                                                                 | Was the researcher male or female?                                                                                                                       | 5                  |
| 5. Experience and training                                                                | What experience or training did the researcher have?                                                                                                     | 5                  |
| Relationship with participants                                                            |                                                                                                                                                          |                    |
| 6. Relationship established                                                               | Was a relationship established prior to study commencement?                                                                                              | 5                  |
| 7. Participant knowledge of the interviewer                                               | What did the participants know about the researcher? e.g. personal goals, reasons for doing the research                                                 | N                  |
| 8. Interviewer characteristics                                                            | What characteristics were reported about the interviewer/facilitator? e.g. Bias, assumptions, reasons and interests in the research topic                | N                  |
| <b>Domain 2: study design</b>                                                             |                                                                                                                                                          |                    |
| <b>Theoretical framework</b>                                                              |                                                                                                                                                          |                    |
| 9. Methodological orientation and Theory                                                  | What methodological orientation was stated to underpin the study? e.g. grounded theory, discourse analysis, ethnography, phenomenology, content analysis | 6                  |
| <b>Participant selection</b>                                                              |                                                                                                                                                          |                    |
| 10. Sampling                                                                              | How were participants selected? e.g. purposive, convenience, consecutive, snowball                                                                       | 4                  |
| 11. Method of approach                                                                    | How were participants approached? e.g. face-to-face, telephone, mail, email                                                                              | 6                  |
| 12. Sample size                                                                           | How many participants were in the study?                                                                                                                 | 4                  |
| 13. Non-participation                                                                     | How many people refused to participate or dropped out? Reasons?                                                                                          | N                  |
| <b>Setting</b>                                                                            |                                                                                                                                                          |                    |
| 14. Setting of data collection                                                            | Where was the data collected? e.g. home, clinic, workplace                                                                                               | 6                  |
| 15. Presence of non-participants                                                          | Was anyone else present besides the participants and researchers?                                                                                        | 6                  |
| 16. Description of sample                                                                 | What are the important characteristics of the sample? e.g. demographic data, date                                                                        | 7                  |
| <b>Data collection</b>                                                                    |                                                                                                                                                          |                    |
| 17. Interview guide                                                                       | Were questions, prompts, guides provided by the authors? Was it pilot tested?                                                                            | 5                  |

|                                        |                                                                                                                                   |       |
|----------------------------------------|-----------------------------------------------------------------------------------------------------------------------------------|-------|
| 18. Repeat interviews                  | Were repeat interviews carried out? If yes, how many?                                                                             | 6     |
| 19. Audio/visual recording             | Did the research use audio or visual recording to collect the data?                                                               | 6     |
| 20. Field notes                        | Were field notes made during and/or after the interview or focus group?                                                           | N     |
| 21. Duration                           | What was the duration of the interviews or focus group?                                                                           | 6     |
| 22. Data saturation                    | Was data saturation discussed?                                                                                                    | 6     |
| 23. Transcripts returned               | Were transcripts returned to participants for comment and/or correction?                                                          | N     |
| <b>Domain 3: analysis and findings</b> |                                                                                                                                   |       |
| <b>Data analysis</b>                   |                                                                                                                                   |       |
| 24. Number of data coders              | How many data coders coded the data?                                                                                              | 6     |
| 25. Description of the coding tree     | Did authors provide a description of the coding tree?                                                                             | N     |
| 26. Derivation of themes               | Were themes identified in advance or derived from the data?                                                                       | 8     |
| 27. Software                           | What software, if applicable, was used to manage the data?                                                                        | 6     |
| 28. Participant checking               | Did participants provide feedback on the findings?                                                                                | 6     |
| <b>Reporting</b>                       |                                                                                                                                   |       |
| 29. Quotations presented               | Were participant quotations presented to illustrate the themes / findings? Was each quotation identified? e.g. participant number | 8--12 |
| 30. Data and findings consistent       | Was there consistency between the data presented and the findings?                                                                | 8--13 |
| 31. Clarity of major themes            | Were major themes clearly presented in the findings?                                                                              | 8--13 |
| 32. Clarity of minor themes            | Is there a description of diverse cases or discussion of minor themes?                                                            | 8--13 |

# BMJ Open

## How Novice, Skilled and Advanced Clinical Researchers Include Variables in a Case Report Form for Clinical Research: A Qualitative Study

|                                 |                                                                                                                                                                                                                                                                                                                                                                                                                                                                                                                                                                                                                                                                                                                                                                                                                                                                                                                             |
|---------------------------------|-----------------------------------------------------------------------------------------------------------------------------------------------------------------------------------------------------------------------------------------------------------------------------------------------------------------------------------------------------------------------------------------------------------------------------------------------------------------------------------------------------------------------------------------------------------------------------------------------------------------------------------------------------------------------------------------------------------------------------------------------------------------------------------------------------------------------------------------------------------------------------------------------------------------------------|
| Journal:                        | <i>BMJ Open</i>                                                                                                                                                                                                                                                                                                                                                                                                                                                                                                                                                                                                                                                                                                                                                                                                                                                                                                             |
| Manuscript ID                   | bmjopen-2017-016760.R2                                                                                                                                                                                                                                                                                                                                                                                                                                                                                                                                                                                                                                                                                                                                                                                                                                                                                                      |
| Article Type:                   | Research                                                                                                                                                                                                                                                                                                                                                                                                                                                                                                                                                                                                                                                                                                                                                                                                                                                                                                                    |
| Date Submitted by the Author:   | 18-Jul-2017                                                                                                                                                                                                                                                                                                                                                                                                                                                                                                                                                                                                                                                                                                                                                                                                                                                                                                                 |
| Complete List of Authors:       | <p>Chu, Hongling; Peking University Third Hospital, Research Center of Clinical Epidemiology</p> <p>Zeng, Lin; Peking University Third Hospital, Research Center of Clinical Epidemiology</p> <p>Fetters, Micheal; University of Michigan Department of Family Medicine</p> <p>Li, Nan; Peking University Third Hospital, Research Center of Clinical Epidemiology</p> <p>Tao, Liyuan; Peking University Third Hospital, Research Center of Clinical Epidemiology</p> <p>Shi, Yanyan; Peking University Third Hospital, Research Center of Clinical Epidemiology</p> <p>Zhang, Hua; Peking University Third Hospital, Research Center of Clinical Epidemiology</p> <p>Wang, Xiaoxiao; Peking University Third Hospital, Research Center of Clinical Epidemiology</p> <p>Li, Fengwei; Beijing Aerospace General Hospital</p> <p>zhao, yiming; Peking University Third Hospital, Research Center of Clinical Epidemiology</p> |
| <b>Primary Subject Heading</b>: | Qualitative research                                                                                                                                                                                                                                                                                                                                                                                                                                                                                                                                                                                                                                                                                                                                                                                                                                                                                                        |
| Secondary Subject Heading:      | Research methods, Qualitative research                                                                                                                                                                                                                                                                                                                                                                                                                                                                                                                                                                                                                                                                                                                                                                                                                                                                                      |
| Keywords:                       | QUALITATIVE RESEARCH, clinical study, data collection, research design                                                                                                                                                                                                                                                                                                                                                                                                                                                                                                                                                                                                                                                                                                                                                                                                                                                      |
|                                 |                                                                                                                                                                                                                                                                                                                                                                                                                                                                                                                                                                                                                                                                                                                                                                                                                                                                                                                             |

SCHOLARONE™  
Manuscripts

1  
2  
3  
4  
5  
6  
7  
8  
9  
10  
11  
12  
13  
14  
15  
16  
17  
18  
19  
20  
21  
22  
23  
24  
25  
26  
27  
28  
29  
30  
31  
32  
33  
34  
35  
36  
37  
38  
39  
40  
41  
42  
43  
44  
45  
46  
47  
48  
49  
50  
51  
52  
53  
54  
55  
56  
57  
58  
59  
60

**How Novice, Skilled and Advanced Clinical Researchers Include  
Variables in a Case Report Form for Clinical Research:  
A Qualitative Study**

**Chu Hongling, Zeng Lin, Michael D Fetters, Li Nan, Tao Liyuan, Shi Yanyan,  
Zhang Hua, Wang Xiaoxiao, Li Fengwei, Zhao Yiming**

**Corresponding author:** Zhao Yiming, Peking University Third Hospital, Research  
Center of Clinical Epidemiology, 49#, Huayuanbei Road, Haidian District Beijing,  
P.R.China 100191. [yimingzhao115@163.com](mailto:yimingzhao115@163.com), +86-010-82266577,  
+86-010-82265732.

**Chu Hongling, Zeng Lin, Li Nan, Tao Liyuan, Shi Yanyan, Zhang Hua, Wang  
Xiaoxiao, Zhao Yiming:** Peking University Third Hospital, Research Center of  
Clinical Epidemiology, Beijing, China.

**Michael D Fetters:** University of Michigan Department of Family Medicine, Ann  
Arbor, MI, US.

**Li Fengwei:** Beijing Aerospace General Hospital, Beijing, China.

**Abstract**

**Objectives:** Despite varying degrees in research training, most academic clinicians  
are expected to conduct clinical research. The objective of this research was to  
understand how clinical researchers of different skill levels include variables in a case  
report form for their clinical research.

**Setting:** The setting for this research was a major academic institution in Beijing,  
China.

**Participants:** The target population was clinical researchers with three levels of  
experience, namely, limited clinical research experience, clinicians with rich clinical

1  
2  
3 research experience and clinical research experts.

4  
5 **Methods:** Using a qualitative approach, we conducted 13 individual interviews (face-  
6  
7 to-face) and one group interview (n=4) with clinical researchers from June to  
8  
9 September 2016. Based on maximum variation sampling to identify researchers with  
10  
11 three levels of research experience: 8 clinicians with limited clinical research  
12  
13 experience, 5 clinicians with rich clinical research experience, and 4 clinical research  
14  
15 experts. These 17 researchers had diverse hospital-based medical specialties and or  
16  
17 specialization in clinical research.

18  
19 **Results:** Our analysis yields a typology of three processes developing a case report  
20  
21 form that varies according to research experience level. Novice clinician researchers  
22  
23 often have an incomplete protocol or none at all, and conduct data collection and  
24  
25 publication based on a general framework. Experienced clinician researchers include  
26  
27 variables in the case report form based on previous experience with attention to  
28  
29 including domains or items at risk for omission, and by eliminating unnecessary  
30  
31 variables. Expert researchers consider comprehensively in advance data collection and  
32  
33 implementation needs and plan accordingly.

34  
35 **Conclusion:** These results illustrate increasing levels of sophistication in research  
36  
37 planning that increase sophistication in selection for variables in the case report form.  
38  
39 These findings suggest that novice and intermediate-level researchers could benefit by  
40  
41 emulating the comprehensive planning procedures such as those utilized by expert  
42  
43 clinical researchers.

44  
45 **Keywords:** qualitative research; clinical study; data collection, research design

## 46 47 **Article summary**

### 48 49 **Strengths and limitations of this study**

- 50 • The study used qualitative interviews to explore the novel topic of how  
51 researchers create a case report form.
- 52 • The study involved the development of three visual models to depict the  
53 approach of novice, excellent, and expert clinical researchers
- 54 • The expert clinical researchers shared guiding principles they use to conduct  
55  
56  
57  
58  
59  
60

1  
2  
3 research.

- 4  
5 • A limitation of our study concerns the potential selection bias of our sample as  
6 clinician participants are from a premier academic hospital in Beijing, and  
7 these participants might have greater knowledge, cognitive skills, and  
8 opportunities for research than clinicians in many other hospitals in China.  
9  
10  
11

## 12 13 14 INTRODUCTION

15  
16  
17  
18 Conducting clinical research is a multistage process. It can be divided into three  
19 stages: the first stage is top-level design, the second stage is protocol design and  
20 implementation, the third stage is conducting data analysis, interpretation and writing  
21 of the paper<sup>1</sup>. During the first two stages, researchers should consider what variables  
22 are important, and how to collect the data.  
23  
24

25  
26  
27 A case report form (CRF) is an instrument to structure and facilitate collection of  
28 data for clinical research<sup>2</sup>. Most CRFs are customized to collect data specific to a  
29 particular clinical study protocol. Case report form development represents a  
30 significant part of the clinical trial process and can impact study success. A  
31 well-designed CRF is required for database construction, data accuracy, data  
32 query/cleaning, CRF completion and statistical analysis.  
33  
34

35  
36  
37  
38 In the Research Center of Clinical Epidemiology, to facilitate greater clinical  
39 research efficiency, the question that how to develop an approach to build a CRF  
40 became meaningful. This interest extended to both the structure and variables of the  
41 CRF. The structure has been the topic of concern among some researchers<sup>3-11</sup>. In one  
42 published paper, Li et al. emphasize that the design of CRF needs the cooperation and  
43 efforts of each member of the study group<sup>7</sup>. In another related paper, Wan et al note  
44 that the CRF should maintain privacy for participants, include a tracked page or  
45 modules, and some other fields on forms<sup>10</sup>. However, the question about what  
46 variables should be included in CRF has received less consideration despite its crucial  
47 role in the quality of clinical research.  
48  
49

50  
51  
52  
53  
54  
55  
56  
57 The goal of this qualitative research study was to explore how clinical  
58  
59  
60

1  
2  
3 researchers select variables for a CRF, and was part of a larger mixed-methods project  
4 to develop an approach for clinical researchers to build systematic variables for  
5 clinical research. These findings of this research could provide an approach for  
6 choosing variables in a CRF by clinical researchers. This can serve as a reference to  
7 other researchers, and lay a foundation for further inquiry into what variables to  
8 include in a CRF.  
9  
10  
11  
12  
13

## 14 15 16 17 **METHOD**

18 Qualitative inquiry is an approach particularly useful when little is known about  
19 the phenomenon under study<sup>12</sup>. As little is known about how clinicians determine  
20 variables to include in a CRF it was deemed a qualitative approach as useful.  
21  
22  
23

### 24 **Setting:**

25 The setting for this research was a heavily research-focused major academic  
26 institution and also is a University hospital in Beijing, China.  
27  
28

### 29 **Study Population:**

30 These hospitals are host to over 1000 faculty, and to some degree there is an  
31 expectation, or hope that all will engage in clinical research at some level. Maximum  
32 variation sampling<sup>13</sup> was used in this study. The target population was clinical  
33 researchers with three levels of experience, namely, limited clinical research  
34 experience, clinicians with rich clinical research experience and clinical research  
35 experts. Seventeen clinical researchers chose to participate in this study.  
36  
37  
38  
39  
40  
41  
42

### 43 **Data collection instrument:**

44 A semi-structured interview guide was first developed based on a group  
45 discussion and a preliminary pilot study with 2 clinical researchers. The primary  
46 interview question developed to generate data for the study was, “What process do  
47 you use to design a case report form for clinical research?” Key probes were, “What  
48 are the difficulties and challenges encountered when you designed case report form  
49 for your project?” and “What is your previous experience joining a clinical research  
50 project?” The overall interview guide was designed for a study looking  
51 comprehensively at clinical researchers’ approaches to data collection and thus had  
52  
53  
54  
55  
56  
57  
58  
59  
60

1  
2  
3 additional questions in the interview guide as well.  
4

5  
6 **Recruitment:**

7 Individuals targeted for enrollment were contacted by email by a research  
8 assistant. We used maximum variation sampling to identify individuals with different  
9 degrees of research experience and different medical specialties in the project's host  
10 academic institution, a teaching hospital and clinical research institute in Beijing.  
11

12 The inclusion criteria were:

- 13  
14  
15  
16 a. Meet one of the following conditions: 1) Clinicians with limited clinical research  
17 experience who were defined as rarely participating in clinical research, a criterion  
18 operationalized as no experience to one experience designing a CRF for clinical  
19 research; 2) clinicians with rich clinical research experience defined as researchers  
20 with experience participating in several clinical research studies and experience  
21 designing three to nine data collection reforms or case report forms for clinical  
22 research. 3) Clinical research experts defined as researchers with experience in  
23 clinical research for five years or more, and participation directly in 10 or more  
24 clinical research projects.  
25  
26  
27  
28  
29  
30  
31  
32  
33  
34

35  
36 **Data collection**

37 Two research assistants (RAs), both females with a PhD, conducted interviews  
38 from June to September in 2016. The RAs first conducted one focus group interview  
39 with clinicians who had limited experience in clinical research. As gathering busy  
40 clinicians for focus group interviews proved difficult, the RAs changed to face-  
41 to-face semi-structured in-depth interviews with an additional nine clinicians and four  
42 clinical research experts. The same questions were posed in the same order to all the  
43 participants, whether the interviews were conducted in the focus group or individual  
44 interviews. One question was added for the four clinical research experts, namely,  
45 "What have you encountered when you directed other clinical researchers' project".  
46 The interviews lasted between (25-40) minutes and were conducted in a location that  
47 was quiet without interruption, either the participant's office or the interviewee's  
48 conference room. All interviews were audio-recorded and transcribed verbatim into  
49  
50  
51  
52  
53  
54  
55  
56  
57  
58  
59  
60



1  
2  
3 Chinese. Data collection was complete after 17 interviews, the point when saturation  
4 of themes was reached.  
5  
6  
7

### 8 9 **Data analysis**

10 The transcribed data were analyzed in Chinese using thematic analysis with an  
11 inductive approach. Nvivo 11 was used to assist in the analysis of the data. Two  
12 researchers (CH and ZL) independently coded and analyzed the transcripts by:  
13 selecting the units of analysis, making sense of the transcribed data, developing codes,  
14 categorizing the data and abstracting<sup>14</sup>. The analysis focused on text from the four  
15 primary questions noted above but also used related information from other interview  
16 guide questions and context-specific language probes. The analysts discussed and  
17 reached an agreement on the coding and categorization after reviewing one interview.  
18 The two researchers independently coded the remaining transcripts. Differences were  
19 minimal. All research team members agreed with the final results in a final discussion  
20 meeting. After constructing the models, the team confirmed the findings by checking  
21 the results with the interviews transcript. Member checking was used to share the  
22 results with all the interviewees by email--they raised no objections or new  
23 considerations, and agreed with the findings.  
24  
25  
26  
27  
28  
29  
30  
31  
32  
33  
34  
35  
36

37 Below, the findings of the study are presented by illustrating the three identified  
38 models and illustrative quotes from the interviews. The researchers who conducted  
39 the data collection and analysis translated the quotes selected for this article into  
40 English. Original quotes are available upon request.  
41  
42  
43  
44  
45

### 46 47 **Ethical considerations**

48 The institutional review board (IRB) at Peking University Third Hospital  
49 approved the study. Each participant was informed about the study procedures and  
50 was free to withdraw from the research. All participants provided consent to  
51 participate in the study including audiotaping and transcription of the interviews by  
52 providing written informed consent. Potentially identifying information was removed  
53 from each transcript and each interviewee was assigned a unique identification  
54  
55  
56  
57  
58  
59  
60

number to protect his/her anonymity.

## RESULTS

The 17 clinical researchers had diverse backgrounds, including otolaryngology, pharmacy, endocrinology, orthopedics, anesthesia, radiology, neurology, cardiology, nephrology, Hematology, thoracic surgery, epidemiology and biostatistics, clinical epidemiology, clinical research data management, and clinical research methodology.

(Table1)

**Table 1 Demographics of the participants**

| Participants level                         | Clinicians with limited clinical research experience                                                  | Clinicians with rich clinical research experience        | Clinical research experts                     |
|--------------------------------------------|-------------------------------------------------------------------------------------------------------|----------------------------------------------------------|-----------------------------------------------|
| Number                                     | 8                                                                                                     | 5                                                        | 4                                             |
| Gender                                     |                                                                                                       |                                                          |                                               |
| Male (N)                                   | 2                                                                                                     | 2                                                        | 3                                             |
| Female (N)                                 | 6                                                                                                     | 3                                                        | 1                                             |
| Average age (mean $\pm$ SD)                | 27 $\pm$ 4                                                                                            | 35 $\pm$ 2                                               | 44 $\pm$ 12                                   |
| Department                                 | Otolaryngology, Pharmacy, Endocrinology, Orthopedics, Anesthesia, Radiology, Neurologist, Cardiology. | Nephrology, Otolaryngology, Thoracic surgery, Hematology | Epidemiology Or Clinical research methodology |
| Experience in clinical research (projects) | Participating in clinical research work for 1-3 years                                                 | Being involved in 5-12 clinical research projects        | Working in clinical research for 11-20 years  |
| Data collection                            | 4 semi-structured in-depth interviews, and 1 focus group interview for 4 clinicians                   | Semi-structured in-depth interviews                      | Semi-structured in-depth interviews           |

### **A typology of how clinical researchers of different skill levels include variables in CRF for clinical research**

Based on our analysis, we developed a typology of how clinical researchers of different skill levels select variables in a CRF for clinical research. These three

1  
2  
3 models are illustrated as Figures 1, 2, and 3. The findings are supported by quoted  
4 comments from the research participants. The models are illustrated using a flow  
5 chart showing the different process for each of three levels of the participants, e.g.,  
6 novice clinicians with limited clinical research experience, intermediate-level  
7 clinicians with rich clinical research experience, and clinical research experts.  
8  
9

10  
11  
12  
13 **a. The novice clinical researcher's approach to selecting variables in a CRF**  
14 **for clinical research.**

15  
16 Novice clinicians with limited clinical research experience described a  
17 multi-faceted approach to selecting variables for inclusion in their CRFs. When they  
18 planned the variables to include in their CRFs, most had no clearly defined  
19 comprehensive approach.  
20  
21  
22

23  
24 **Finding the template from similar research and imitating it.** Most novice  
25 clinical researchers mentioned that they would find a similar data collection form for  
26 reference and modify it according to the needs of their own study. As one  
27 endocrinologist noted, “First, I search on the Internet to find a template from similar  
28 research, then I modify the template based on my research”. One otolaryngology  
29 clinician said, “I ask for a data collection template from other experienced researchers  
30 in my department. I then imitate the template to make my own data collection  
31 template, and modify it in places according my research.” An Orthopedics clinician  
32 reflected his opinion that most novice clinical researchers are doing like this, “I will  
33 imitate another data collection template, then copy what is applicable to my research,  
34 and modify those variables that are not applicable. I think most of us follow, because  
35 it is easier for us.”  
36  
37  
38  
39  
40  
41  
42  
43  
44  
45

46  
47 **Discussing with clinicians with rich clinical research experience.** Some  
48 novice clinical researchers reported discussing the CRF with experienced clinical  
49 researchers. One participant recounted, “I discussed the CRF with clinicians with rich  
50 experience in clinical research. They deleted useless items directly.”  
51  
52  
53

54  
55 **Modifying again if any problems are found during use.** Some novice clinical  
56 researchers directly used the data collection form without a pilot study, and modified  
57 it only when they found problems during use. An anesthesia clinician said, “When the  
58  
59  
60

1  
2  
3 CRF is used to collect data in a clinical research project, some variables are found not  
4 to be applicable or absent. In this case, I always think about it and then modify/add  
5 the variables.” Another cardiology clinician also remarked, “When I use the CRF to  
6 collect data from the first few participants, I find some variables can’t get data at all.  
7 So I realize that these variables also can’t get data from other participants, and these  
8 variables can contribute little to my research. Then I delete them.”

9  
10  
11 The following flow chart was refined from the above in-depth interviews with  
12 four clinicians and a group interview with another four clinicians.

13  
14  
15 **Figure 1. Novice clinical researchers' approach to developing a CRF for clinical**  
16 **research**

17  
18  
19 **b. The experienced clinical researcher's approach to selecting variables in a**  
20 **CRF for clinical research.**

21  
22  
23 Experienced clinical researchers also described a multi-faceted approach for how  
24 they include variables in a CRF. Most of them have a clear purpose and protocol  
25 firstly, and think about the importance, feasibility and statistics of these variables  
26 according to their experience in clinical research.

27  
28  
29 **Confirming the purpose and protocol.** These clinical researchers first concern  
30 themselves with confirming the purpose and developing a protocol before designing  
31 the CRF. For example, a nephrologist said, “First, you should confirm the purpose of  
32 your study, disease features or prognosis, follow-up study or cross-sectional study.”

33  
34  
35 **Conducting a literature search for references and related materials.** Most of  
36 the experienced clinical researchers would review the literature and related materials  
37 to consider the variables for inclusion in the CRF. “I think searching the related  
38 literature and other references is important. You can find many variables mentioned in  
39 other’s research. You also can list all the related items for reference.”

40  
41  
42 **Finding a template from similar research and intimating it.** Experienced  
43 clinical researchers also find a template to imitate for their own study. However, they  
44 consider the variables according to the research protocol, literature and their previous  
45 experience. One hematologist explained, “(I) search materials first, then find a  
46  
47  
48  
49  
50  
51  
52  
53  
54  
55  
56  
57  
58  
59  
60

1  
2  
3  
4  
5  
6  
7  
8  
9  
10  
11  
12  
13  
14  
15  
16  
17  
18  
19  
20  
21  
22  
23  
24  
25  
26  
27  
28  
29  
30  
31  
32  
33  
34  
35  
36  
37  
38  
39  
40  
41  
42  
43  
44  
45  
46  
47  
48  
49  
50  
51  
52  
53  
54  
55  
56  
57  
58  
59  
60

template from the literature or similar research previously conducted in my department. Then I imitate the template to make CRF for my project, and optimize and perfect the CRF according to the research protocol.”

**Consider the importance, feasibility and statistics of fields.** The experienced clinical researchers note that the importance, feasibility and statistical analysis of collected variables should be considered before deciding whether to collect the data in the first place. One hematologist said, “Even if we do the optimizing and perfecting, we can also find many problems when we use it to collect data in clinical research. We can just modify it again and again. In the final version, many variables are deleted that are not easy to collect, or not very clear, or have little relationship with the primary outcome.”

**Conduct a pilot study and modify the CRF.** These experienced researchers also note that piloting the CRF before using it to collect data is very important. If any problems are found in the pilot study, the problem can be resolved in a timely way. A thoracic surgeon shared, “A pilot study was conducted after the draft CRF was completed. We then recruited some patients to complete it. We found that some items or scales could not be completed. For example, the tinnitus handicap inventory is too complex for patients. And it is not very important for the final evaluation about the treatment, so we deleted it in follow-up visits.”

The flow chart depicted in Figure 2 illustrates the overall steps employed by these experienced clinicians based on their interviews.

**Figure 2. Experienced clinical researcher's approach to selecting variables in a CRF for clinical research.**

**c. The clinical research experts' approach to selecting variables in a CRF for clinical research.**

Clinical research experts described their multi-faceted approach to identifying variables for inclusion in a CRF or how they help other researchers design a CRF. They would consider the study comprehensively, and they raised some different and important views.

1  
2  
3  
4  
5  
6  
7  
8  
9  
10  
11  
12  
13  
14  
15  
16  
17  
18  
19  
20  
21  
22  
23  
24  
25  
26  
27  
28  
29  
30  
31  
32  
33  
34  
35  
36  
37  
38  
39  
40  
41  
42  
43  
44  
45  
46  
47  
48  
49  
50  
51  
52  
53  
54  
55  
56  
57  
58  
59  
60

**Confirming the clinical and scientific issues, hypotheses, and research protocol.** A clear research question and hypotheses are essential before you consider which variables should be included in the CRF. One expert working in the epidemiology research center stated, “First, you complete the top-level design of the clinical research to confirm the clinical issues, scientific issues and hypotheses, and then confirm the research purpose and protocol.”

**PICO model is considered to build the causality model.** The PICO Model is a format used to help define the clinical research question. P stands for Patient /Population/problem; I stands for Intervention/Prognostic factor /Exposure; C stands for Comparison; O stands for Outcome sought to measure or achieve<sup>15</sup>. The PICO model as commonly used in evidence-based medicine, can be employed to build a causality model and clearly confirm the related variables in the CRF. Another clinical research expert working in the epidemiology research center explained, “In clinical research, you need to confirm the PICO, and build the causality model based on the PICO model. Then confirm the primary outcome and secondary outcome based on O (outcome) in PICO model.” “You need to document the domains based on the PICO model. These domains include but are not limited to population characteristics, intervention or exposure and related outcome, and related confounding factors affecting the causality between the intervention and outcome.”

**What's more, “few to many” and “many to few” are used to list and screen domains and variables in the research.** Many clinical researchers worry about omitting key variables in the CRF, so they often list as many variables as possible. However, many variables are not necessary, and the added burden of collecting these data, may even lower the quality of key variables. One expert in the clinical research institute emphasized that, “From less to more’, you need to list variables from all domains as much as possible through multiple ways such as clinical practice experience and literature. ‘Many to few’, we should organize related experts including clinicians, statisticians, data manager and experts on clinical research design to discuss the necessity and feasibility of all the domains and variables. It should be considered in terms of accuracy, sensitivity and difficulty of detection and collection,

1  
2  
3 statistics, ethical problems, cost, quality control and so on.” The flow chart depicted  
4 in Figure 3 illustrates the overall steps used by these 4 clinical research experts.  
5  
6  
7

8  
9 **Figure 3. The expert clinical researcher's approach to selecting variables in a**  
10 **CRF for clinical research**  
11

12  
13  
14 **DISCUSSION**  
15

16 This qualitative study reveals a different process of selecting variables for  
17 inclusion in a CRF for clinical research among three different levels of clinical  
18 researchers. Novice, experienced and expert clinical researchers have progressively  
19 sophisticated approaches for selecting variables in a CRF for clinical research. The  
20 novice clinician researcher approach of finding a template, modifying it according to  
21 their own study, reviewing it with clinicians with rich clinical research experience,  
22 and then completing the CRF when collecting data can be problematic. This process  
23 can truncate thinking about the whole protocol, study purpose, statistics, etc., and  
24 risks compromising the study quality. This point is consistent with previous  
25 discussion of Ioannidis et al<sup>16</sup> that research in a previously understudied domain might  
26 supply too little information to be useful. The resulting risk is, small uninformative  
27 studies that remain common in several specialties.  
28  
29

30 Relative to the existing literature about the development of CRFs, this research  
31 has expanded understanding about what variables should be included in a CRF,  
32 procedures used by expert researchers for first greatly increasing, and then limiting  
33 the range of variables to be studied. The notion of “few to many” and “many to few”  
34 to first comprehensively generate, then severely truncate to limit the domains is  
35 similar to previous advice. Li et al suggest collecting data so as to be able to just  
36 answer the scientific issues or hypothesis, nothing more and nothing less<sup>7</sup>.  
37  
38

39 Based on views from the novice to the expert clinician, the take away message  
40 from this research is that increasing levels of sophistication in research planning  
41 reflect increasing levels of sophisticated selection of variables on the case report form.  
42 As alluded to by Chalmers et al, there are several principles that can help guide  
43  
44  
45  
46  
47  
48  
49  
50  
51

1  
2  
3 clinical researchers to conduct efficient and high quality studies<sup>17</sup>:  
4

- 5 (a) **Build the CRF to align closely with the research design, and develop and**  
6 **modify the protocol and template according to the feasibility of collecting**  
7 **data in clinical practice.** The risk of designing a CRF after completing the  
8 research protocol, is that some variables might not be feasible to collect as part  
9 of the clinical enterprise. The consequence of deviating from the protocol is the  
10 risk of compromised research quality. These findings further remind researchers  
11 to be certain to modify the CRF when the research protocol is modified.  
12  
13 (b) **Align the CRF with the research protocol.** The variables in the CRF should be  
14 consistent with protocol. That is, all domains and variables mentioned in the  
15 protocol should be included in CRF, to avoid missing any important domains or  
16 variables.  
17  
18 (c) **Develop the CRF to be concise and to the point.** In general, variables only  
19 related to the study purpose could be included in the CRF. Unnecessary or  
20 redundant variables can require unnecessary time, effort collecting and  
21 monitoring. This can distract from limited time and energy of researchers to  
22 ensure the quality of key variables in clinical research. Berge et al also identify  
23 that data collection forms can be too complex and burden centers with a  
24 requirement to collect data items that are never analyzed or reported<sup>18</sup>.  
25  
26 (d) **Refine the template to be readily understood and operational.** In the final  
27 template of CRF, every variable should be clear. The structure and order of the  
28 CRF should be consistent with research flow and clinical practice.  
29

30  
31  
32  
33  
34  
35  
36  
37  
38  
39  
40  
41  
42  
43  
44  
45  
46  
47  
48  
49  
50  
51  
52  
53  
54  
55  
56  
57  
58  
59  
60  
These findings speak to fundamentals of conducting high quality research, and while based on research in a single institution, can reasonably be expected to hold true in a broad range of settings. This is consistent with our research expectations.

A potential limitation of our study concerns the risk of selection bias of our sample. Clinician participants are from a premier academic hospital in Beijing, and these participants might have greater knowledge, cognitive skills, and opportunities for research than clinicians in many other hospitals. We acknowledge the potential for variations on the findings in other settings, while also acknowledging the results are



1  
2  
3 genuine and representative of the participants' experiences. Despite variations that  
4 exist in practice, we believe the lessons learned based on this study are transferable  
5 and robust ideas. Another potential limitation is that the interviewers were aware of  
6 the interviewed researchers' experience and the study hypotheses, and this could raise  
7 concern about confirmation bias, however the models were built and reviewed by the  
8 researchers themselves and this suggests that the processes delineated represent their  
9 views.  
10  
11

12  
13  
14  
15  
16 Further studies are needed to assess whether the approaches and variations  
17 described are robust across a wider variety of settings. The proposed expert model  
18 could be further validated by applying it to design of CRF for clinical research in  
19 different levels of hospitals and clinicians from other settings. Regardless, we believe  
20 that while there may be additional considerations, these findings are a robust and  
21 meaningful reference for any clinicians engaged in clinical research, and particularly,  
22 novice and moderately experienced researchers who wish to learn lessons from  
23 experts.  
24  
25  
26  
27  
28  
29  
30

31  
32 In conclusion, this research illustrates that increasing levels of sophistication in  
33 research planning reflect increasing levels of sophistication in the selection of  
34 variables for inclusion in a case report form. Thus, novice and intermediate-level  
35 clinical researchers alike could benefit by emulating the comprehensive planning  
36 procedures utilized by expert clinical researchers.  
37  
38  
39  
40  
41

42 **Acknowledgements:** We sincerely appreciate all the participants who made this  
43 research possible.  
44

45 **Funding:** This study was funded by grant 2013BAI09B14 from the Ministry of  
46 Science and Technology of the People's Republic of China. The funders had no role in  
47 the study design, data collection and analysis, decision to publish, or preparation of  
48 the manuscript.  
49  
50  
51

52 **Contributors:** Chu Hongling and Zeng Lin conducted the interviews and all analyses,  
53 wrote the first draft of the manuscript and rewrote new drafts based on input from  
54 co-authors. Michael Feters provided extensive input on the structuring of the  
55 manuscript, and revisions of the manuscript drafts. Zhao Yiming designed the  
56  
57  
58  
59  
60

1  
2  
3 research project, planned the analyses and provided input and revision of manuscript  
4 drafts. All authors read and approved the final manuscript.  
5  
6

7 **Competing interests:** None to declare.  
8

9 **Participant consent.** Obtained written consent.  
10

11 **Ethics approval:** The Peking University Third Hospital Ethics Review Board  
12 approved the study.  
13

14 **Provenance and peer review:** Not commissioned; externally peer reviewed.  
15

16 **Data sharing statement:** Original quotes and audio data of interviews are available  
17 on request by emailing the corresponding author. The presented data were  
18 anonymized and the risk of identification is low.  
19  
20

21 **Open Access** This is an Open Access article distributed in accordance with the  
22 Creative Commons Attribution Non Commercial (CC BY-NC 4.0) license, which  
23 permits others to distribute, remix, adapt, build upon this work non-commercially, and  
24 license their derivative works on different terms, provided the original work is  
25 properly cited and the use is non-commercial. See: [http://](http://creativecommons.org/licenses/by-nc/4.0/)  
26 [creativecommons.org/licenses/by-nc/4.0/](http://creativecommons.org/licenses/by-nc/4.0/)  
27  
28  
29  
30  
31  
32  
33

## 34 **References:**

- 35 1. Zhao YM, Ding J, Zeng L. Top level design on clinical research. *National Medical Journal of*  
36 *China*. 2010;90(14):942-946. Chinese.
- 37 2. Nahm M, Shepherd J, Buzenberg A, Rostami R, Corcoran A, McCall J, et al. Design and  
38 implementation of an institutional case report form library. *Clin Trials* 2011;8(1):94-102.
- 39 3. Cao AP, Su BH, Ding DY, et al. The case report form in clinical research. *Chinese Journal of*  
40 *Health Statistics*. 2000(03):61-64. Chinese.
- 41 4. Fu, H.J. and X.X. Luo, Key factors in design of case report form. *Yao Xue Xue Bao*, 2015. 50(11):  
42 p. 1452-1455. Chinese.
- 43 5. Li QN, Lu F, An FH, Gao R. The design of case report form and analysis of common related  
44 problem. *Chin J Clin Pharmacol Ther* 2013(08):901-906. Chinese.
- 45 6. Li ST. The design of case report form and its importance in drug clinical trials. *Chines Journal of*  
46 *New Drugs* 2004(01):53-55. Chinese.
- 47 7. Li XY, Wen ZH, Tang XC, Liang WX. The principle and process of case report form design in  
48 clinical trials. *Traditional Chinese Drug Research & Clinical Pharmacology* 2013(02):206-209.  
49 Chinese.
- 50 8. Lou H. The design and application of case report form in evidence-based traditional Chinese  
51 medicine research. Shandong Traditional Chinese Medicine University, 2015. Chinese.  
52  
53  
54  
55  
56  
57  
58  
59  
60

- 1  
2  
3 9. Lv XY, Zhang ZL, Ai YK, et al. Talking about the design of case report form from the point of data  
4 management. *Modernization of Traditional Chinese Medicine and Materia-World Science and*  
5 *Technology* 2014(03):614-617. Chinese.  
6  
7 10. Wan X, Yang H, Liu JP. The design of case report form in clinical research. *Journal of Traditional*  
8 *Chinese Medicine* 2007(10):885-887. Chinese.  
9  
10 11. Wang YH, Jiao YZ. The design of case report form and analysis of related problem in traditional  
11 Chinese medicine research. *China Journal of Traditional Chinese Medicine and Pharmacy*  
12 2005(10):620-623. Chinese.  
13  
14 12. Meyer J. Qualitative research in health care. Using qualitative methods in health related action  
15 research. *BMJ* 2000;320(7228):178-81.  
16  
17 13. Devers KJ, Frankel RM. Study design in qualitative research--2: Sampling and data collection  
18 strategies. *Educ Health (Abingdon)* 2000;13(2):263-71.  
19  
20 14. Elo S, Kyngas H. The qualitative content analysis process. *J Adv Nurs* 2008;62(1):107-15.  
21  
22 15. Kleijnen J, Chalmers I. How to practice and teach evidence-based medicine: role of the Cochrane  
23 Collaboration. *Acta Anaesthesiol Scand Suppl* 1997;111:231-3.  
24  
25 16. Ioannidis JP, Greenland S, Hlatky MA, Khoury MJ, Macleod MR, Moher D, et al. Increasing value  
26 and reducing waste in research design, conduct, and analysis. *Lancet* 2014;383(9912):166-75.  
27  
28 17. Chalmers I, Bracken MB, Djulbegovic B, Garattini S, Grant J, Gulmezoglu AM, et al. How to  
29 increase value and reduce waste when research priorities are set. *Lancet* 2014;383(9912):156-65.  
30  
31 18. Berge E, Salman RA, van der Worp HB, Stapf C, Sandercock P, Sprigg N, et al. Increasing value  
32 and reducing waste in stroke research. *Lancet Neurol* 2017;16(5):399-408.  
33  
34  
35  
36  
37  
38  
39  
40  
41  
42  
43  
44  
45  
46  
47  
48  
49  
50  
51  
52  
53  
54  
55  
56  
57  
58  
59  
60

1  
2  
3  
4  
5  
6  
7  
8  
9  
10  
11  
12  
13  
14  
15  
16  
17  
18  
19  
20  
21  
22  
23  
24  
25  
26  
27  
28  
29  
30  
31  
32  
33  
34  
35  
36  
37  
38  
39  
40  
41  
42  
43  
44  
45  
46  
47  
48  
49  
50  
51  
52  
53  
54  
55  
56  
57  
58  
59  
60

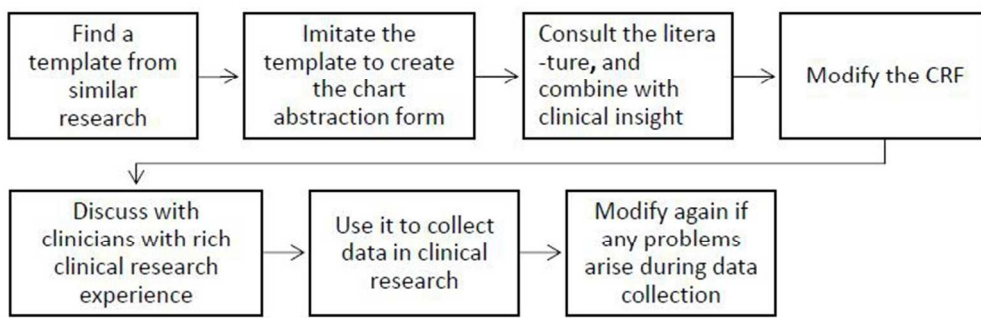

Figure 1. Novice clinical researchers' approach to developing a CRF for clinical research

67x21mm (300 x 300 DPI)

peer review only



Figure 2. Experienced clinical researcher's approach to selecting variables in a CRF for clinical research.

68x22mm (300 x 300 DPI)

peer review only



Figure 3. The expert clinical researcher's approach to selecting variables in a CRF for clinical research

70x34mm (300 x 300 DPI)

Peer review only

| <b>Consolidated criteria for reporting qualitative studies (COREQ): 32-item checklist</b> |                                                                                                                                                          |                                                             |   |
|-------------------------------------------------------------------------------------------|----------------------------------------------------------------------------------------------------------------------------------------------------------|-------------------------------------------------------------|---|
| <b>No Item</b>                                                                            | <b>Guide questions/description</b>                                                                                                                       | <b>Page number</b>                                          |   |
| <b>Domain 1: Research team and reflexivity</b>                                            |                                                                                                                                                          |                                                             |   |
| <b>Personal Characteristics</b>                                                           |                                                                                                                                                          |                                                             |   |
| 1. Interviewer/facilitator                                                                | Which author/s conducted the interview or focus group?                                                                                                   | 5                                                           |   |
| 2. Credentials                                                                            | What were the researcher's credentials? E.g. PhD, MD                                                                                                     | 5                                                           |   |
| 3. Occupation                                                                             | What was their occupation at the time of the study?                                                                                                      | 5                                                           |   |
| 4. Gender                                                                                 | Was the researcher male or female?                                                                                                                       | 5                                                           |   |
| 5. Experience and training                                                                | What experience or training did the researcher have?                                                                                                     | 5                                                           |   |
| 6. Relationship with participants                                                         | Relationship established                                                                                                                                 | Was a relationship established prior to study commencement? | 5 |
| 7. Participant knowledge of the interviewer                                               | What did the participants know about the researcher? e.g. personal goals, reasons for doing the research                                                 | N                                                           |   |
| 8. Interviewer characteristics                                                            | What characteristics were reported about the interviewer/facilitator? e.g. Bias, assumptions, reasons and interests in the research topic                | N                                                           |   |
| <b>Domain 2: study design</b>                                                             |                                                                                                                                                          |                                                             |   |
| <b>Theoretical framework</b>                                                              |                                                                                                                                                          |                                                             |   |
| 9. Methodological orientation and Theory                                                  | What methodological orientation was stated to underpin the study? e.g. grounded theory, discourse analysis, ethnography, phenomenology, content analysis | 6                                                           |   |
| <b>Participant selection</b>                                                              |                                                                                                                                                          |                                                             |   |
| 10. Sampling                                                                              | How were participants selected? e.g. purposive, convenience, consecutive, snowball                                                                       | 4                                                           |   |
| 11. Method of approach                                                                    | How were participants approached? e.g. face-to-face, telephone, mail, email                                                                              | 6                                                           |   |
| 12. Sample size                                                                           | How many participants were in the study?                                                                                                                 | 4                                                           |   |
| 13. Non-participation                                                                     | How many people refused to participate or dropped out? Reasons?                                                                                          | N                                                           |   |
| <b>Setting</b>                                                                            |                                                                                                                                                          |                                                             |   |
| 14. Setting of data collection                                                            | Where was the data collected? e.g. home, clinic, workplace                                                                                               | 6                                                           |   |
| 15. Presence of non-participants                                                          | Was anyone else present besides the participants and researchers?                                                                                        | 6                                                           |   |
| 16. Description of sample                                                                 | What are the important characteristics of the sample? e.g. demographic data, date                                                                        | 7                                                           |   |
| <b>Data collection</b>                                                                    |                                                                                                                                                          |                                                             |   |
| 17. Interview guide                                                                       | Were questions, prompts, guides provided by the authors? Was it pilot tested?                                                                            | 5                                                           |   |

|                                        |                                                                                                                                   |       |
|----------------------------------------|-----------------------------------------------------------------------------------------------------------------------------------|-------|
| 18. Repeat interviews                  | Were repeat interviews carried out? If yes, how many?                                                                             | 6     |
| 19. Audio/visual recording             | Did the research use audio or visual recording to collect the data?                                                               | 6     |
| 20. Field notes                        | Were field notes made during and/or after the interview or focus group?                                                           | N     |
| 21. Duration                           | What was the duration of the interviews or focus group?                                                                           | 6     |
| 22. Data saturation                    | Was data saturation discussed?                                                                                                    | 6     |
| 23. Transcripts returned               | Were transcripts returned to participants for comment and/or correction?                                                          | N     |
| <b>Domain 3: analysis and findings</b> |                                                                                                                                   |       |
| <b>Data analysis</b>                   |                                                                                                                                   |       |
| 24. Number of data coders              | How many data coders coded the data?                                                                                              | 6     |
| 25. Description of the coding tree     | Did authors provide a description of the coding tree?                                                                             | N     |
| 26. Derivation of themes               | Were themes identified in advance or derived from the data?                                                                       | 8     |
| 27. Software                           | What software, if applicable, was used to manage the data?                                                                        | 6     |
| 28. Participant checking               | Did participants provide feedback on the findings?                                                                                | 6     |
| <b>Reporting</b>                       |                                                                                                                                   |       |
| 29. Quotations presented               | Were participant quotations presented to illustrate the themes / findings? Was each quotation identified? e.g. participant number | 8--12 |
| 30. Data and findings consistent       | Was there consistency between the data presented and the findings?                                                                | 8--13 |
| 31. Clarity of major themes            | Were major themes clearly presented in the findings?                                                                              | 8--13 |
| 32. Clarity of minor themes            | Is there a description of diverse cases or discussion of minor themes?                                                            | 8--13 |
